1                   **Essential oil composition of *Callistemon citrinus* (Curtis) and its protective**  
2                   **assessment towards *Tribolium castaneum* (Herbst) (Coleoptera: Tenebrionidae)**

3  
4                   Maduraiveeran Ramachandran<sup>a</sup>, Kathirvelu Baskar<sup>b\*</sup>, Abeer Hashem<sup>c,d</sup>, Elsayed Fathi  
5                   Abd\_Allah<sup>e</sup>, Manickkam Jayakumar<sup>a\*\*</sup>,

6                   <sup>a</sup>Department of Zoology, University of Madras, Chennai - 25, Tamil Nadu, India

7                   <sup>b</sup>Department of Ecotoxicology, Ross Lifescience Pvt, Ltd., Bhosari, Pune, Maharashtra-411026,  
8                   India.

9                   <sup>c</sup>Botany and Microbiology Department, College of Science, King Saud University, P.O. Box.  
10                   2460, Riyadh 11451, Saudi Arabia (<https://orcid.org/0000-0001-6541-347X>).

11                   <sup>d</sup>Mycology and Plant Disease Survey Department, Plant Pathology Research Institute, ARC,  
12                   Giza 12511, Egypt.

13                   <sup>e</sup>Plant Production Department, College of Food and Agricultural Sciences, King Saud  
14                   University, P.O. Box. 2460, Riyadh 11451, Saudi Arabia ([https://orcid.org/0000-0002-8509-](https://orcid.org/0000-0002-8509-8953)  
15                   8953).

16  
17                   **Corresponding authors:**

18                   **Senior Author- \*\*Dr. Manickkam Jayakumar Email: [jaismohai@gmail.com](mailto:jaismohai@gmail.com)**

19                   **\*Dr. Kathirvelu Baskar Email: [suribaskar@hotmail.com](mailto:suribaskar@hotmail.com)**

20  
21                   **Abstract**

22                   Essential oil (EO) was extracted from *Callistemon citrinus* leaves by hydro-distillation.  
23                   The extracted oil was analysed by GC and Mass Spectroscopy. Analysis report showed that the  
24                   major constituent of the essential oil was eucalyptol (40.44%). The EO of *C. citrinus* exhibited  
25                   100% fumigation toxicity (adult mortality) against adult and 95.8% larvicidal activity against  
26                   *Tribolium castaneum* at 160 µL/L (12 hrs) and 320 µL/L (48 hrs), respectively. The effective  
27                   concentration of 37.05 µL/L (adult) and 144.31 µL/L (larva) at 24 and 48 hrs respectively. A

28 100% repellent activity was observed at 20 µl for adult beetles and 93.3% for larvae of *T.*  
29 *castaneum* at 20 µl after 24 h. Exposure to *C. citrinus* EO significantly reduced beetle fecundity,  
30 ovicidal activity, egg hatching, larvae survival, and emergence of adult. The effect of EO on  
31 detoxification enzymes of *T. castaneum* adults was examined. Results indicated that the activity  
32 of detoxification enzymes drastically varied when compared with control. This EO had toxicant  
33 effects on all stages of the life of *T. castaneum*. Hence it may be used as fumigant instead of the  
34 use of using synthetic chemical fumigants.

35 **Key Words:** *Tribolium castaneum*; essential oil; fumigation; detoxification; enzymes; IPM.

## 36 **Introduction**

37 Insect infestation on stored grains, pulses, and their processed products is a major  
38 problem that results in significant economic losses and reduces the quality as well as the quantity  
39 of stored food products. Stored grains can be infested by several insect pests that cause severe  
40 damage. Storage pests alone damaged 14-17 million tonnes of food grains and nearly 15 insect  
41 species have been are listed as major stored grain pests in India [1]. Amongst, *Tribolium*  
42 *castaneum*, listed in the major pest category of stored grains, although predominantly found in  
43 tropical countries. Both larvae and adult of *T. castaneum* feed grains, seeds, and milled  
44 commodities. This beetle is responsible for approximately 10-40% of post-harvest losses  
45 worldwide [2], while in India estimates of losses range from 7-10% [3].

46 Fumigation is an effective method of pest management in stored grains. This method is  
47 used to control all stages of insects in stored grains and is cost effective, rapidly killing insects  
48 and leaving residues [4]. Currently, methyl bromide (CH<sub>3</sub>Br) and aluminium phosphide (AIP) are  
49 approved for use on stored grain and are used as synthetic fumigants. However, Methyl  
50 bromides, has ozone depleting properties [5-7]. and insect resistance to phosphine has been

51 documented [8-9]. Application of fumigants leads to increasing pest resurgence, deleterious  
52 effects on beneficial organisms, as well as raising the levels of toxicity [10]. To address these  
53 problems naturally biodegradable plant products have been evaluated.

54 Interestingly, plant leaves were used as a stored grain protectant in ancient times.  
55 Traditionally, plant-derived oils were used to protect stored pulses. More recently, essential oils  
56 (EOs) derived from plant have been receiving more attention as an alternatives to synthetic  
57 fumigants. Plant products protect food grains through their insecticidal and repellent properties.  
58 Plant-derived products are also generally harmless to flora and fauna in the environment. Thus,  
59 many researchers tested the plant essential oils for their biological potential against pests of  
60 stored food grains [11-14]. Essential oils have been extracted from members of the Myrtaceae,  
61 Lauraceae, Umbelliferae, Lamiaceae, Asteraceae, and from conifers [15-16].

62 Essential oils can exhibit fumigation toxicity, repellent activity, pupicidal activity,  
63 ovicidal, and oviposition deterrents against insect pests of stored grains [17-22]. Hence the  
64 present investigation was aimed to evaluate toxicity effect of *Callistemon citrinus* essential oil  
65 against *Tribolium castaneum*.

## 66 **Materials and Methods**

### 67 Culture of insect

68 The *Tribolium castaneum*, was maintained in Insectarium, Department of Zoology,  
69 University of Madras, and cultured on wheat flour. Freshly laid eggs, emerged larvae, and adults  
70 were used in the experiments.

### 71 Chemicals

72 The chemical used in the study were analytical grade and were purchased from Sigma-  
73 Aldrich and Sisco Research Laboratories Pvt. Ltd. (India).

## 74 Oil Extraction and GC-MS analysis

75 *Callistemon citrinus* (Bottle brush) was collected from the campus of University of  
76 Madras. The oil was extracted from freshly-collected plant leaves by hydro-distillation, then it  
77 was subjected to GC-MS analysis.

## 78 Toxicity Study

79 Fumigation toxicity of *C. citrinus* EO was tested in the laboratory using filter paper  
80 method on adult insect at  $28 \pm 2^\circ\text{C}$  and 60–70% RH [23]. Two different ranges of concentrations  
81 such as 40, 80, 120, 160 and 200  $\mu\text{l/L}$ , and 40, 80, 120, 160, 200, 240, 280, and 320  $\mu\text{l/L}$  air were  
82 evaluated for fumigation toxicity on adults and larvae, respectively. Ten freshly-emerged 3-7-  
83 day-old adult/10-12 days, old larvae were released in a bottle along with a small amount of flour  
84 as feed. The EO was poured on filter paper and it was adhered inside the screw cap of the bottle  
85 then closed tightly. Without treatment of essential oil to be consider control. Five replications  
86 were made for all treatments and controls. Mortality of adults and larvae were recorded after 3,  
87 6, 9, 12, 24, 36, and 48 h commencement of treatments. Dead insects were counted, if there were  
88 no antennal or leg movements. Mortality was calculated using the Abbott formula [24].

## 89 Repellency - Larvae

90 The repellency of EO was measured using the diet impregnation method on larvae.  
91 Twenty-five larvae per Petri dish and replicated five times. After 2, 4, 6, 12 and 24 h of treatment  
92 the number of larvae present in the treated and control diets were counted.

## 93 Repellency - adult

94 The repellency effect of EO was evaluated with the help of glass olfactometer (Y- tube)  
95 on adult insect. Two grams of medium was mixed with different concentration of 5, 10, 20, and  
96 30  $\mu\text{l}$  of EO individually in each vial and attached into an arm of the olfactometer. Medium

197 without essential oil was used as a control. All the glass vials attached to the arms and then fifty  
198 freshly-emerged adults were released into the olfactometer via the central opening. The number  
199 of beetles found in each vial was recorded after 24 hrs [25]. The percentage of repellent activity  
200 was calculated [26].

201 % of repellency =  $C - T / C + T \times 100$

202 C- control; T- treatment

203 Fecundity and knock-down effect

204 Ten adults were released into Petri dish (100 ml) with known quantity of wheat flour.  
205 Filter paper (Whatman No. 1) discs measuring about 2 cm dia, were impregnated with different  
206 concentrations (5, 10, 20 and 30  $\mu\text{L/L}$ ) of *C. citrinus* EO. At 24 hrs after treatment the adult were  
207 transferred to new Petri dish with food. The Petri dishes were carefully examined and recorded  
208 the number of eggs laid in control and treatments for a period of 2 days by using compound  
209 microscope. Knock-down adults were counted separately and recorded as a knock-down effect.  
210 Five replications were used for each treatment and the control group.

211 Growth inhibition effects

212 Fifty adult beetles released in a Petri dish containing known quantity of wheat flour.  
213 After 48 h, the adult beetles were removed and numbers of eggs laid in each Petri dish were  
214 counted. Subsequently, the filter paper treated with different sub-lethal concentrations of EO was  
215 placed inside a Petri dish. Filter paper discs devoid of any volatiles were used as a control. The  
216 experiments were replicated five times for both treatments and control. The eggs hatched in each  
217 Petri dish was recorded daily and were maintained continuously on wheat flour. The larval  
218 survivability & per cent adult emergence ( $F_1$ ) were recorded.

219

120 Sample preparation for biochemical studies

121 Adult insects were treated with sub-lethal concentrations of 5, 10 and 20  $\mu\text{L/L}$  of EO.  
122 The live insects were used in the biochemical analysis which consisted of three replicates.  
123 Treated adults (10 individuals for each concentration) were transferred separately and  
124 homogenized with 500  $\mu\text{l}$  of ice-cold phosphate buffer (20 mM, pH 7.0) using a Teflon, hand  
125 homogenizer to estimate the total protein, esterase, phosphatase, and Glutathione-S-Transferase  
126 activity. The homogenates were centrifuged at 15,000 rpm at 4  $^{\circ}\text{C}$  for 20 min. and the clear  
127 supernatants were stored at -20  $^{\circ}\text{C}$  until used. The supernatants were used for both qualitative  
128 and quantitative analyses.

129 Biochemical analyses

130 Biochemical studies were carried out using previously described methods. The Bradford  
131 assay was used to determine total protein [27], acetylcholinesterase activity [28-29],  $\alpha$  and  $\beta$   
132 carboxylesterase [30] activity was estimated [31], levels of acid phosphatases (ACP) and alkaline  
133 phosphatases [32] were determined using the method of Koodalingam et al. [31] and Glutathione-  
134 S-Transferase activity was measured by Brogden and Barber [33] method.

135 Estimation of biochemical components

136 The total protein, acid & alkaline phosphatases and  $\beta$ -carboxylesterase of adult were  
137 examined by discontinuous PAGE gel using non-denatured conditions. The gel electrophoresis  
138 was run by using 5% stacking gel (pH 6.8) and 8% separating gel (pH 8.8) in Tris-glycine buffer  
139 (pH 8.3). The page was provided constant current of 4 mA per sample at 10 $^{\circ}\text{C}$  on a slab gel; then  
140 it was stained.

142 Estimation of esterase and phosphates activity

143 The  $\alpha$  &  $\beta$ -carboxylesterase activity were detected by using separated protein bands by  
144 the method of Kirkeby and Moe [34]; Argentine and James [35]. Acid and alkaline phosphatase  
145 activities were analysed as describe by Houk and Hardy [36].

146 Statistical analysis

147 Student's 't' test was carried out to determine the significant differences between the  
148 biochemical constituents and enzyme activity in the treatments and control. Differences between  
149 means were considered as significant at  $p \leq 0.05$ . All statistical analyses done original data (after  
150 transformed also the data did not showed significant distribution Shapiro wilk test). The probit  
151 analysis was done for fumigation toxicity. Significant different between the treatment group was  
152 calculated Duncans test followed by F-Test. The SPSS software, version 25 was used for  
153 analysis.

## 154 **Results**

155 Oil yield

156 EO of *C. citrinus* was extracted from the leaves using a Clevenger apparatus at 65 °C for  
157 3 h. Initially the oil was whitish in colour but later turned a pale yellow. The maximum yield of  
158 650  $\mu$ L/100 g (fresh weight of leaves) was obtained.

159 Chemical composition of essential oils

160 Chemical composition of the *C. citrinus* EO was analysed by GC-MS and identified 10  
161 different compounds in varying quantities. Among the 10 compounds, eucalyptol represented the  
162 major constituent (40.44%), followed by linalool (27.35%), and alfa- Pinene (17.36%) (Table 1).

## 164 Toxicity Study

165 Fumigation toxicity of EO was evaluated against adults at 40, 80, 120, 160 and 200  $\mu\text{L/L}$   
166 concentrations. At 160  $\mu\text{L/L}$  of EO showed 100% of adult beetle's mortality at 9 h of treatment.  
167 More than 91.56% of mortality recorded at 120  $\mu\text{L/L}$  concentration during 24 h observation  
168 period. At the lowest concentration (40 $\mu\text{L/L}$ ) of *C. citrinus* oil exhibited 50% mortality after 24 h  
169 of exposure, and there was a gradual increase in insect mortality while increasing concentrations  
170 of EO. The lethal concentration ( $\text{LC}_{50}$ ) of *C. citrinus* oil against *T. castaneum* adults after 24 h of  
171 exposure was 37.05  $\mu\text{L/L}$  (Table 2a). The overall results, *C. citrinus* essential oil showed a time  
172 and concentration related effect against *T. castaneum*.

## 173 Repellency - Larvae

174 Larvicidal activity of EO was studied at different concentrations *viz.*, 40, 80, 120, 160,  
175 200, 240, 280 and 320  $\mu\text{L/L}$ . Maximum larvicidal activity of 95.78% was observed at 320  $\mu\text{L/L}$   
176 concentration on 48 hrs after exposure period, while the lowest concentration (40  $\mu\text{L/L}$ )  
177 exhibited 16.89% larvicidal activity. More than 50% larvicidal activity was recorded at 160  $\mu\text{L/L}$   
178 during 48 h after treatment. The lethal concentration ( $\text{LC}_{50}$ ) of *C. citrinus* oil against *T.*  
179 *castaneum* larvae was 144.31  $\mu\text{L/L}$  for 48 h of exposure (Table 2b). The fumigation toxicity of  
180 *C. citrinus* EO was concentration and time dependent against *T. castaneum* larvae, however, the  
181 larvae appeared to be more tolerance to the EO than adults.

## 182 Repellency - adult

183 Repellent activity of four different concentrations (5, 10, 15 and 20  $\mu\text{L/L}$ ) of *C. citrinus*  
184 EO was evaluated against *T. castaneum* adults using a Y-arm olfactometer. A 100% adult  
185 repellent activity was observed at 20  $\mu\text{L}$  concentrations after 24 h. The lower concentration of  
186 EO exhibited more than 31.1% repellent activity (Table 3).



187           The larval repellency was conducted in Petri dishes using a choice-based method at 5, 10,  
188 15 and 20  $\mu\text{L}$  concentrations and different observation period of 2, 4, 6, 12, and 24 h. The  
189 maximum repellency (93.3%) was observed at 20  $\mu\text{L}$  concentrations at 24 h observation. Lowest  
190 concentration showed 30% repellent activity against *T. castaneum* larvae at 24 h (Table 3).  
191 Overall, the results indicate that the EO exhibited good repellence potential on both larvae and  
192 adults.

#### 193 Fecundity and knock-down activity

194           The oviposition study was carried out at 5, 10, 20 & 30  $\mu\text{L/L}$  concentrations of EO by  
195 fumigation toxicity. Fecundity in the control beetle group laid on an average of 5.8 eggs per  
196 individual. The concentration of 20 & 30  $\mu\text{L/L}$  showed 2.6 and 1.4 eggs. In terms of per cent  
197 reduction; 20 & 30  $\mu\text{L/L}$  concentrations showed 55.17 & 75.86% reduction in fecundity,  
198 respectively. *C. citrinus* EO significantly reduced oviposition deterrence activity at 20 & 30  $\mu\text{L/L}$   
199 (Table 4). Knockdown effect was increased according the increasing concentration. Maximum  
200 knockdown activity of 35.5% was observed at 30 $\mu\text{L/L}$ .

#### 201 Growth inhibition effects

#### 202 Ovicidal activity and egg hatchability

203           The ovicidal activity of *C. citrinus*, EO was studied against *T. castaneum* at four different  
204 concentrations. Maximum ovicidal activity of 91.49% was observed at 30  $\mu\text{L/L}$  concentration of  
205 EO.

206           The 5  $\mu\text{L/L}$  concentration exhibited egg hatchability of 56.55% while control exhibited  
207 89.15% egg hatchability. The minimum egg hatchability of 8.51% was recorded at 30  $\mu\text{L/L}$   
208 concentration (Table 5).

210 Larvae survival and adult emergence

211 Larval survival, and adult emergence ( $F_1$  generation) were 86.96% and 80.58%,  
212 respectively in the control group. In contrast, the 30  $\mu\text{L/L}$  concentration of EO exhibited larval  
213 survival 42.54%, and it was notably lower than the control. The 30  $\mu\text{L/L}$  treatment allows 5.15%  
214 of adult to emerge, when compared to control concentration A significant reduction in adult  
215 emergence 5.15% was observed at 30  $\mu\text{L/L}$ .

216 Quantitative analysis of *T. castaneum* adult biochemistry

217 Based on the obtained results, sub-lethal concentrations (5, 10 and 20  $\mu\text{L/L}$ ) were used to  
218 study the impact of *C. citrinus* EO on various biochemical constituents in adult *T. castaneum*  
219 beetles. Results indicated that the biochemical constituents measured in *T. castaneum* adult  
220 beetles can significantly vary after exposure to sub-lethal concentrations of EO for 24 h. The  
221 total protein content of *T. castaneum* adult was highly and significantly reduced relative to the  
222 control value of 7.43 mg/mL of protein to 6.19 mg/mL, 5.72 mg/mL, 5.32 mg/mL in adults  
223 exposed to different concentrations (5, 10 and 20  $\mu\text{L/L}$ ) of EO, respectively (Fig. 1a).  
224 Acetylcholinesterase activity dramatically increased in the 10 and 20  $\mu\text{L/L}$  treatments when  
225 compared to the control; while, at 20  $\mu\text{L/L}$  concentration treatment reduced Acetylcholinesterase  
226 activity (Fig. 1b).

227 The level of  $\alpha$ -Carboxylesterase activity was significantly increased at three of the  
228 selected sub-lethal concentrations of EO, compared to the control (Fig. 1c).  $\beta$ -carboxylesterase  
229 activity level was also drastically elevated in the 5, 10 and 20  $\mu\text{L/L}$  treatments compared to the  
230 control, however, no significant difference was observed between the different sub-lethal  
231 treatments (Fig. 1d).

232 Exposure of *T. castaneum* adults to *C. citrinus* EO resulted in decreased level of acid  
233 phosphatase at selected concentrations when compared to control group (Fig. 1e). Alkaline  
234 phosphatase activity was significantly reduced in the 5  $\mu\text{L/L}$  treatment and drastically elevated in  
235 the 10  $\mu\text{L/L}$  treatment. Significantly lower activity was recorded in the 20 treatment when  
236 compared to the control group (Fig. 1f). Glutathione-S-Transferase levels significantly increased  
237 in the 10 and 20  $\mu\text{L/L}$  treatments, relative to the control group, but was significantly lower,  
238 relative to the control, in the 10  $\mu\text{L/L}$  treatment (Fig. 1g).

### 239 3.9 Qualitative analysis of *T. castaneum* adult biochemistry

240 A qualitative analysis of total proteins was analysed using the native PAGE method.  
241 Protein extracted from *T. castaneum* adults treated with sub-lethal concentrations of *C. citrinus*  
242 EO showed a reduction in the number protein bands, relative to the control (Fig. 2a). The  
243 intensity of the esterase band of  $\beta$ -Carboxylesterase isoenzyme was modulated by the  
244 concentration of EO. The intensity of the band was lowered in the 10 treatment but increased  
245 gradually as the concentration of EO increased. The two lower isoenzyme bands decreased in  
246 their intensity, relative to the control, at the lower concentrations of EO and gradually increased  
247 when beetles were exposed to higher concentration of EO (Fig. 2b). Electrophoretic analysis of  
248 acid and alkaline phosphatase enzyme activity in adult beetles was not affected by exposure to  
249 the range of sub-lethal concentrations of EO used in the experiment (Fig. 2c,d).

## 250 Discussion

251 Botanical pesticides have the potential to eradicate pests without causing harm to the  
252 environment and non-target organisms. Since botanicals are generally biodegradable and do not  
253 leave persistent residue, they have been increasingly used in recent years. Essential oils obtained  
254 from plants have been shown to be very effective on insect pests, especially in stored grains.

255 Since they are generally volatile in nature, essential oils are very easy to use and kill the pests of  
256 stored grains. In the present study, essential oil extracted from *C. citrinus* leaves was tested for  
257 its potential against the larvae and adult beetles of *T. castaneum*.

258 GC-MS analysis of *C. citrinus* revealed six different compounds, in which eucalyptol was  
259 the major constituent (40.44%), followed linalool (27.34%), and alfa- Pinene (17.46%).  
260 However, GC-MS analysis of EO from the same plant from Ethiopia revealed 15 different  
261 compounds, which also included eucalyptol as the major constituent (76.9%) [37]. In contrast,  
262 EO extracted from the same plant growing in Western Himalayas contained only 9.8%  
263 eucalyptol [38]. These data clearly indicated that the level and type of constituents in EO  
264 extracted from this plant varies depending on where the plant was collected, and most likely the  
265 climate and ecology of that region. These results are in accordance with Misharina [39], Souza  
266 and Vendramim [40], Isikber et al. [41], who indicated that the variations in extracted  
267 compound's, could be associated with geographical location, collection time, amount of sunlight,  
268 length of storage, temperature, and extraction methods.

269 Fumigation is one of the most effective, practically feasible, and rapid methods that can  
270 be used to protect feedstuffs, stored food grains and other agricultural products from pest  
271 infestation [42-43]. Many plant essential oils and their constituent compounds have been  
272 reported to have fumigant activity. Essential oils of *Artemisia annua* [44], *Lipia alba* [45],  
273 *Curcuma longa* [46], *Cinnamomum camphora*, *Eucalyptus globules* [47], *Boswellia carterii* [48],  
274 *C. camphora*, *Myristica fragrans*, *Rosmarinus officinalis* [11] and *Mentha piperita* [13], are  
275 reported to have biocidal activity against stored grain pests. Bioactivity can vary greatly,  
276 however, due to the variability in chemical composition of each EO and the stage of plant growth  
277 and plant organ that was used for extraction. In the present study, fumigation with EO extracted

278 from leaves of *C. citrinus* resulted in 100% mortality in adult beetles of *T. castaneum* at 9 hrs  
279 after treatment at a concentration of 160  $\mu\text{L/L}$ . Similar results were obtained from the use of  
280 *Coriandrum sativum* seed oil, where mortality in *C. maculatus* and *T. confusum* increased with  
281 the use of increasing concentrations of EO from 43 to 357  $\mu\text{L/L}$  air [49]. The EO used in our  
282 study exhibited different levels of toxicity to larvae vs. adult beetles. In general, fumigation  
283 toxicity was lower against larvae than adult beetles. Earlier, Liu and Ho [50]; Huang et al. [51],  
284 Tripathi et al.[46]; Isikber et al. [41] have been reported similar results.

285 Several plant essential oils exhibit feeding deterrence, acute toxicity, repellency and  
286 developmental disruption in many storage insect pests due to the complex combinations of  
287 monoterpenoids and allied phenolic compounds present in essential oils [52-55].  $\beta$ -pinene has  
288 been reported to exhibit strong toxicity and repellent activity against *T. castaneum* adults [56].  $\alpha$ -  
289 cymene,  $\alpha$ -terpinene,  $\alpha$ -terpeneol, and terpine-4-ol exhibited fumigant activity against *S. oryzae*  
290 [57]. In general, the major volatile components in an essential oil are responsible for its activity.  
291 As demonstrated by Maciel et al. [58], eucalyptus oil, in which, 8-cineole is the major  
292 component, exhibited strong biological activity. Our results are in accordance with earlier  
293 literature where it stated that eucalyptol, linalool, and terpine-4-ol are present as major  
294 constituents of the selected EO. Thus, a very high degree of fumigation, repellent, and other  
295 biological activity was observed.

296 The number of eggs laid by adult beetle was significantly ( $P < 0.05$ ) lowered by exposure  
297 of adult beetles to cardamom oil at 16 and 21  $\text{mg/cm}^2$  concentrations [59]. In the present study, a  
298 significant reduction in oviposition was recorded when adult beetles were exposed to different  
299 concentrations of EO. Similarly, Moura et al. [22] also reported that EO derived from *Vanillosn*  
300 *opsis arborea* reduced the level of oviposition when compared to control. A previous report

301 indicated the decreased oviposition (28%) at 5.2 mg/cm<sup>2</sup> concentration when the adult beetles  
302 were exposed to EO derived from leaves of *C. loga*. The reduction in oviposition was probably  
303 due to physically weakened insects as well as lesser surviving insects [46].

304 The inhibition of egg hatchability or ovicidal activity was rapidly exhibited by exposure  
305 to the EO without any direct contact with the eggs due the volatiles released by the EO. The  
306 vapour of essential oils has been shown to diffuse through the permeable membranes of insect  
307 eggs into the chorion and vitelline membrane [60-61]. The diffusion of essential oil vapours into  
308 the eggs results in a disruption in normal physiological and biochemical processes [62]. The  
309 ovicidal activity observed in the present study confirms the above statements, as the tested EO  
310 resulted, 91.49% ovicidal activity in *T. castaneum*.

311 The suppression and reduction of the F1 generation could be due to the toxicity of EO to  
312 all of the all life stages of the insect, from eggs to adults, via both fumigant and possibly stomach  
313 action [59]. In the present study, a drastic reduction (94.85%) was observed in adult emergence  
314 when the eggs were exposed to EO.

315 Proteins are the most abundant organic compounds in the insect body as they provide  
316 structure and muscle to the insect body, transport substances into the haemolymph, provide  
317 energy, and catalyse chemical reactions in the form of enzymes [63-64]. Decreasing protein  
318 content is commonly occurs when the insects treated with lethal compounds [65]. Protein  
319 synthesis may be reduced or inhibited in response to prolonged toxic stress [66-68]. Insects  
320 degrade the protein content into amino acid and the release energy to compensate the lowering  
321 energy level during stress condition by Nath et al. [69]. Reductions in protein levels were  
322 observed in the present study and has been previously reported that protein content was reduced  
323 due to the toxicity of plant product [70-72,25].

324 Esterases are synthesized in insects during various development stages. The level of  
325 esterase activity is not constant throughout the life cycle. In the present study, AChE activity was  
326 inhibited by the higher concentrations of *C. citrinus* oil. Saponins are able to inhibit AChE and  
327 the inhibition increases with increasing concentration [73]. Inhibiting AChE results in the  
328 accumulation of acetylcholine at cholinergic synapses and causes hyper excitation of cholinergic  
329 pathways [74].

330 Carboxylesterase activity can be altered by plant secondary metabolites. Phenolic  
331 glycoside significantly increased the level of Carboxylesterase in *Lymantria dispar* [75]. A  
332 higher level of CarE activity was recorded in *Sitobion avenae* fed on diet with high in indole  
333 alkaloid content [76]. In the present study, both  $\alpha$ - CarE and  $\beta$ - CarE levels increased in adult  
334 beetles exposed to *C. citrinus* EO.

335 Hydrolytic cleavage of phosphoric acid esters is catalysed by Phosphatase enzymes that  
336 are classified into "acid" or "alkaline" phosphatases based on their pH [77]. Acid phosphatases  
337 are a lysosomal marker enzyme whose active site is in the gut of insects [78-82]. Alkaline  
338 phosphatases are a brush border membrane marker [83]. Exposure to plant compounds reduced  
339 the acid and alkaline phosphatases content in *Cnaphalocrocis medinalis* larvae [84]. A  
340 methanolic extract of *Melia azedarach* reduced the acid and alkaline phosphatases in fourth instar  
341 larvae of *C. medinalis* [85]. Similarly, *C. citrinus* EO also reduced both acid and alkaline  
342 phosphatase activity in a concentration dependent manner.

343 Glutathione transferases are the enzymes that catalyse the detoxification of insecticides  
344 typically after the phase-I metabolic process [86]. In the present study, elevated GST levels were  
345 observed in adult beetles exposed to the higher concentrations of *C. citrinus* EO. Shojaei et al

346 [87] reported that adults of *Tribolium castaneum* exposure to *Artemisia dracunculus* EO  
347 enhanced the level of Glutathione-S-Transferase in a concentration dependent manner.

## 348 **5. Conclusion**

349 Essential oils exhibits wide range of biological activities which includes fumigant,  
350 repellent, oviposition and growth inhibitory activity, and act up on all insect development stages.  
351 Therefore, the potential of resistance development is very low. The present study provided  
352 promising results on the use of an EO extracted from leaves of *C. citrinus* against all life stages  
353 of the beetle, *T. castaneum*. Importantly, this potent essential oil may be useful for controlling  
354 beetle infestations in stored grains. However, further research will be required to address safety  
355 concerns regarding its effect on human health and the environment, as well to develop suitable  
356 formulations that improve insecticidal activity and reduce production costs.

## 357 **Acknowledgement**

358 The present study was funded by the DST (DST-PURSE Phase II Programme), India,  
359 New Delhi sanctioned to Dr. M. Jayakumar Assistant Professor University of Madras. The  
360 authors would like to extend their sincere appreciation to the Deanship of Scientific Research at  
361 King Saud University for funding this research group NO (RG-1435-014).

## 362 **Reference**

- 363 1. Ramaraju K. Post-harvest loss in food grains at 6%: ICAR. The economic times Business News  
364 2013.
- 365 2. Papachristos DP, Stamopoulos DC. Repellent, toxic and reproduction inhibitory effects of  
366 essential oil vapours on *Acanthoscelides obtectus* (Say) (Coleoptera: Bruchidae). J Stored  
367 Prod Res. 2002; 38(2): 117-128 [https://doi.org/10.1016/S0022-474X\(01\)00007-8](https://doi.org/10.1016/S0022-474X(01)00007-8)



- 368 3. Shukla BD, Patil RT. Overview of grain drying and storage problems in India' in World Bank  
369 Report 1999, "Post-harvest Management, Fight Hunger with FAO, India Grains". World  
370 Bank Report 2002; 4(3).
- 371 4. Graver JEVS. Guide to Fumigation under Gas-Proof Sheets. Food and Agricultural  
372 Organization of the United Nations, Rome 2004.
- 373 5. WMO Scientific assessment of ozone depletion: World Meteorological Organization Report. 25.  
374 World Meteorological Organization, UN, Geneva, 1991.
- 375 6. Anonymous, Regulatory action under the clean air act on methyl bromide. United States  
376 Environmental Protection Agency, Office of Air Radiation Stratospheric Protection  
377 Division, Washington, DC, 1993.
- 378 7. Ogendo JO, Kostyukovsky M, Ravid U, Matasyoh JC, Deng AL, et al. Bioactivity of *Ocimum*  
379 *Gratissimum* L. oil and two of its constituents against five insect pests attacking stored  
380 food products. J Stored Prod Res. 2008; 44(4): 328.
- 381 8. Bell CH, Wilson SM. Phosphine tolerance and resistance in *Trogoderma granarium* Everts  
382 (Coleoptera: Dermestidae). J Stored Prod Res. 1995; 31(3): 199-205.  
383 [https://doi.org/10.1016/0022-474X\(95\)00012-V](https://doi.org/10.1016/0022-474X(95)00012-V).
- 384 9. Alzahrani SM, Ebert PR. Stress pre-conditioning with temperature, UV and gamma radiation  
385 induces tolerance against phosphine toxicity. PLoS ONE 2018; 13(4): e0195349.  
386 <https://doi.org/10.1371/journal.pone.0195349>.
- 387 10. Garry V, Griffith J, Danzl T, Nelson R, Whoston E. Human genotoxicity: pesticide applicators  
388 and phosphine. Sci. 1989; 246: 251- 255.

- 389 11. Jayakumar M, Seenivasan SP, Rehman F, Ignacimuthu S. Fumigant effect of some essential  
390 oils against pulse beetle, *Callosobruchus maculatus* (Fab.) (Coleoptera: Bruchidae).  
391 African Entomol. 2017; 25(1);193-199.
- 392 12. Janaki S, Zandi-Sohani N, Ramezani L, Szumny A. Chemical composition and insecticidal  
393 efficacy of *Cyperus rotundus* essential oil against three stored product pests. *Inter Biodeter*  
394 *Biodegradation*. 2018; 13: 93-98. <https://doi.org/10.1016/j.ibiod.2018.06.008>.
- 395 13. Rajkumar V, Gunasekaran C, Christy IK, Dharmaraj J, Chinnaraj P. Toxicity, antifeedant and  
396 biochemical efficacy of *Mentha piperita* L. essential oil and their major constituents  
397 against stored grain pest. *Pesticide Biochem Physiol*. 2019; 156; 138-144.  
398 <https://doi.org/10.1016/j.pestbp.2019.02.016>.
- 399 14. Chen Z, Pang X, Guo S, Zhang W, Geng Z. Chemical Composition and Bioactivities of  
400 *Alpinia Katsumadai* Hayata seed essential oil against three stored product insects. *J*  
401 *Essential Oil Bearing Plants*. 2019; 22(2): 504-515.  
402 <https://doi.org/10.1080/0972060X.2019.1611482>.
- 403 15. Regnault-Roger C. The potential of botanical essential oils for insect pest control. *Integrated*  
404 *Pest Management Reviews* 1997; 2(1): 25-34. <https://doi.org/10.1023/A:101847222>.
- 405 16. Regnault-Roger C, Vincent C, Arnason JT. Essential oils in insect control: low-risk products  
406 in a high-stakes world. *Ann Rev Entomol*. 2012; 57: 405-424.  
407 <https://doi.org/10.1146/annurev-ento-120710-100554>.
- 408 17. Koutsaviti A, Antonopoulou V, Vlassi A, Antonatos S, Michaelakis A. Chemical composition  
409 and fumigant activity of essential oils from six plant families against *Sitophilus oryzae*

- 410 (Col: Curculionidae). J Pest Sci. 2018; 91(2): 873-886. <https://doi.org/10.1007/s10340->  
411 [017-0934-0](https://doi.org/10.1007/s10340-017-0934-0).
- 412 18. Upadhyay N, Dwivedy AK, Kumar M, Prakash B. Dubey NK. Essential oils as eco-friendly  
413 alternatives to synthetic pesticides for the control of *Tribolium castaneum*  
414 (Herbst)(Coleoptera: Tenebrionidae). J Essential Oil Bearing Plants. 2018; 21(2): 282-297  
415 <https://doi.org/10.1080/0972060X.2018.1459875>.
- 416 19. Wagan TA, Cai W, Hua H. Repellency, toxicity, and anti-oviposition of essential oil of  
417 *Gardenia jasminoides* and its four major chemical components against whiteflies and  
418 mites. Sci Reports. 2018; 8(1): 9375. <https://doi.org/10.1038/s41598-018-27366-5>.
- 419 20. Alcalá-Orozco M, Caballero-Gallardo K, Stashenko EE, Olivero-Verbel J. Repellent and  
420 fumigant actions of the essential oils from *Elettaria cardamomum* (L.) Maton, *Salvia*  
421 *officinalis* (L.) Linnaeus, and *Lippia origanoides* (V.) Kunth against *Tribolium castaneum*  
422 and *Ulomoides dermestoides*. J Essential Oil Bearing Plants. 2019; 22(1): 18-30.  
423 <https://doi.org/10.1080/0972060X.2019.1585966>.
- 424 21. Joshi R, Tiwari SN. Fumigant toxicity and repellent activity of some essential oils against  
425 stored grain pest *Rhyzopertha dominica* (Fabricius). J Pharmacognosy Phytochem. 2019;  
426 8(4): 59-62.
- 427 22. Moura ES, Faroni LRA, Zanuncio JC, Heleno FF, Prates LHF. Insecticidal activity of  
428 *Vanillosmopsis arborea* essential oil and of its major constituent  $\alpha$ -bisabolol against  
429 *Callosobruchus maculatus* (Coleoptera: Chrysomelidae). Sci Reports. 2019; 9; 3723.  
430 doi:10.1038/s41598-019-40148-x.

- 431 23. Negahban M, Moharramipour S. Fumigant toxicity of *Eucalyptus intertexta*, *Eucalyptus*  
432 *sargentii* and *Eucalyptus camaldulensis* against stored product beetles. J Appl Entomol.  
433 2007; 131: 256–261. <https://doi.org/10.1111/j.1439-0418.2007.01152.x>
- 434 24. Abbott WS. A method for computing the effectiveness of an insecticide. J Econ Entomol.  
435 1925; 18: 265–267. <https://doi.org/10.1093/jee/18.2.265a>.
- 436 25. Moses JP, Nattudurai G, Baskar K, Arokiyaraj S, Jayakumar M. Efficacy of essential oil from  
437 *Clausena anisata* and its impact on biochemical changes of *Sitophilus oryzae*. Environ Sci  
438 Pollut Res. 2020; 27: 23215 -23221 <https://doi.org/10.1007/s11356-020-08928-5>
- 439 26. Karemu CK, Ndung'u MW, Githua M. Repellent effects of essential oils from selected  
440 eucalyptus species and their major constituents against *Sitophilus zeamais* (Coleoptera:  
441 Curculionidae). Int J Trop Insect Sci. 2013; 33: 188-194.  
442 <https://doi.org/10.1017/S1742758413000179>.
- 443 27. Bradford MM. A Rapid and Sensitive method for the quantitation of microgram quantities of  
444 protein utilizing the principle of protein-dye binding. Analy Biochem. 1976; 72: 248-254  
445 [https://doi.org/10.1016/0003-2697\(76\)90527-3](https://doi.org/10.1016/0003-2697(76)90527-3).
- 446 28. Ellman GL, Courtney KD, Andres V. Feather-Stone RM. A new and rapid colorimetric  
447 determination of acetylcholinesterase activity. Biochem Pharmacol. 1961; 7: 88-95.  
448 [https://doi.org/10.1016/0006-2952\(61\)90145-9](https://doi.org/10.1016/0006-2952(61)90145-9).
- 449 29. Ikezawa H, Taguchi R. Phosphatidylinositol-specific phospholipase C from *Bacillus cereus*  
450 and *Bacillus thuringiensis*. Methods Enzymol. 1981; 71: 731–741.  
451 [https://doi.org/10.1016/0076-6879\(81\)71086-3](https://doi.org/10.1016/0076-6879(81)71086-3).

- 452 30. Asperen KV. A study of house fly esterase by means of a sensitive colorimetric method. J  
453 Insect Physiol. 1962; 8: 401–416. [https://doi.org/10.1016/0022-1910\(62\)90074-4](https://doi.org/10.1016/0022-1910(62)90074-4).
- 454 31. Koodalingam A, Deepalakshmi R, Ammu M, Rajalakshmi A. Effects of NeemAzal on marker  
455 enzymes and hemocyte phagocytic activity of larvae and pupae of the vector mosquito  
456 *Aedes aegypti*. J Asia-Pacific Entomol. 2014; 17: 175–181.  
457 <https://doi.org/10.1016/j.aspen.2013.12.007>.
- 458 32. Asakura K. Phosphatase activity in the larva of the euryhaline mosquito, *Aedes togoi*  
459 Theobald, with special reference to sea water adaptation. J Exp Mar Biol Ecol. 1978; 31:  
460 325–337, [https://doi.org/10.1016/0022-0981\(78\)90067-9](https://doi.org/10.1016/0022-0981(78)90067-9).
- 461 33. Brogden WG, Barber AM. Microplate assay of glutathione-S-transferase activity for resistance  
462 detection in single mosquito triturates. Comp Biochem Physiol. 1990; 96: 339–342.  
463 DOI: [10.1016/0305-0491\(90\)90385-7](https://doi.org/10.1016/0305-0491(90)90385-7).
- 464 34. Kirkeby S, Moe D. Hydrolyses of  $\alpha$ -naphthyl acetate,  $\beta$ -naphthyl acetate, and acetyl-DL-  
465 phenylalanine  $\beta$ -naphthyl ester. Acta Histochem. 1983; 72: 225–231.  
466 [https://doi.org/10.1016/S0065-1281\(83\)80058-0](https://doi.org/10.1016/S0065-1281(83)80058-0)
- 467 35. Argentine JA, James AA. Characterization of a salivary gland-specific esterase in the vector  
468 mosquito, *Aedes aegypti*. Insect Biochem Mol Biol. 1995; 25: 621–630.  
469 [https://doi.org/10.1016/0965-1748\(94\)00103-O](https://doi.org/10.1016/0965-1748(94)00103-O) (1995).
- 470 36. Houk EJ, Hardy JL. Alkaline phosphatases of the mosquito, *Culex tarsalis* coquillett. Comp  
471 Biochem Physiol. 1984; 78(2): 303–310. DOI: [10.1016/0305-0491\(84\)90034-8](https://doi.org/10.1016/0305-0491(84)90034-8).

- 472 37. Aweke N, Yeshanew S. Chemical composition and antibacterial activity of essential oil of  
473 *Callistemon citrinus* from Ethiopia. European Journal of Medicinal Plants. 2016; 17(1): 1-  
474 7. <https://doi.org/10.9734/EJMP/2016/27987>.
- 475 38. Kumar D, Sukapaka M, Babu GDK, Padwad Y. Chemical Composition and *In vitro*  
476 cytotoxicity of essential oils from leaves and flowers of *Callistemon citrinus* from Western  
477 Himalayas. PloS One 2015; 10(8): p.e0133823. doi: [10.1371/journal.pone.0133823](https://doi.org/10.1371/journal.pone.0133823).
- 478 39. Misharina TA. Influence of the Duration and Conditions of Storage on the Composition of the  
479 Essential Oil from Coriander from Coriander Seeds. Appl Biochem Microbiol. 2001; 37:  
480 622-628. <https://doi.org/10.1023/A:1012315403828>.
- 481 40. Souza APD, Vendramim JD. Insecticidal activity of aqueous extracts of Meliaceae plants on  
482 the silverleaf whitefly, *Bemisia tabaci* (Genn.) Biotype B (Hemiptera:  
483 Aleyrodidae). Neotrop Entomol. 2001; 30(1); 133-137. [http://dx.doi.org/10.1590/S1519-  
484 566X2001000100019](http://dx.doi.org/10.1590/S1519-566X2001000100019).
- 485 41. Isikber AA, Alma MH, Kanat M, Karci A. Fumigant toxicity of essential oils from *Laurus*  
486 *nobilis* and *Rosmarinus officinalis* against all life stages of *Tribolium confusum*.  
487 Phytoparasitica. 2006; 34(2): 167-177. <https://doi.org/10.1007/BF02981317>.
- 488 42. Shaaya E, Kostjukovski M, Eilberg J, Sukprakarn C. Pliant oils as fumigants and contact  
489 insecticides for the control of stored-product insects. J Stored Prod Res. 1997; 33: 7-15.  
490 [doi.org/10.1016/S0022-474X\(96\)00032-X](https://doi.org/10.1016/S0022-474X(96)00032-X).
- 491 43. Emekci M. Section: fumigation, modified atmospheres and hermetic storage. In 10<sup>th</sup> Int Work  
492 Conf Stored Prod Prot Lisbon, Portugal, 2010.

- 493 44. Tripathi AK, Prajapati V, Aggarwal KK, Khanuja SPS, Kumar S. Repellency and toxicity of  
494 oil from *Artemisia annua* to certain Stored-Product beetles. J Econ Entomol 2000; 93(1):  
495 43-47. <https://doi.org/10.1603/0022-0493-93.1.43>.
- 496 45. Verma N, Tripathi AK, Prajapati V, Bahal JR, Bansal RP, et al. Toxicity of essential oil from  
497 *Lippia alba* towards stored grain insects. J Med Aromat Plant Sci. 2000; 22: 117–119.
- 498 46. Tripathi AK, Prajapati V, Verma N, Bahl JR, Bansal RP, et al. Bioactivities of the leaf  
499 essential oil of *Curcuma longa* (var. Ch-66) on three species of stored-product beetles  
500 (Coleoptera). J Econ Entomol. 2002; 95: 183–189. [https://doi.org/10.1603/0022-0493-](https://doi.org/10.1603/0022-0493-95.1.183)  
501 [95.1.183](https://doi.org/10.1603/0022-0493-95.1.183).
- 502 47. Nattudurai G, Paulraj MG, Ignacimuthu S. Fumigant toxicity of volatile synthetic compounds  
503 and natural oils against red flour beetle *Tribolium castaneum* (Herbst) (Coleoptera:  
504 Tenebrionidae). J King Saud Uni–Sci. 2012; 24: 153–159.  
505 <https://doi.org/10.1016/j.jksus.2010.11.002>.
- 506 48. Kiran S, Kujur A, Patel L, Ramalakshmi K, Prakash B. Assessment of toxicity and  
507 biochemical mechanisms underlying the insecticidal activity of chemically characterized  
508 *Boswellia carterii* essential oil against insect pest of legume seeds. Pesticide Biochem  
509 Physiol. 2017; 139: 17-23. <https://doi.org/10.1016/j.pestbp.2017.04.004>.
- 510 49. Khani A, Rahdari T. Chemical composition and insecticidal activity of essential oil from  
511 *Coriandrum sativum* seeds against *Tribolium confusum* and *Callosobruchus*  
512 *maculatus*. ISRN Pharmaceutics 2012 <http://dx.doi.org/10.5402/2012/263517>.
- 513 50. Liu ZL, Ho SH. Bioactivity of the essential oil extracted from *Evodia rutaecarpa* Hook F.  
514 Thomas against the grain storage insects, *Sitophilus zeamais* (Motsch) and *Tribolium*

- 515 *castaneum* (Herbst). J Stored Prod Res. 1999; 35(4): 317–328.  
516 [https://doi.org/10.1016/S0022-474X\(99\)00015-6](https://doi.org/10.1016/S0022-474X(99)00015-6).
- 517 51. Huang Y, Chen SX, Ho SH. Bioactivities of methyl allyl disulfide and diallyl trisulfide from  
518 essential oil of garlic to two species of stored-product pests, *Sitophilus zeamais*  
519 (Coleoptera: Curculionidae) and *Tribolium castaneum* (Coleoptera: Tenebrionidae). J Econ  
520 Entomol. 2000; 93: 537-543. <https://doi.org/10.1603/0022-0493-93.2.537>.
- 521 52. Singh G, Upadhyay RK. Essential oils: a potent source of natural pesticides. J Sci Ind Res.  
522 1993; 52; 676–683.
- 523 53. Wink M. Production and application of phytochemicals from an agricultural perspective. In:  
524 van Beek TA, Breteler H. (Eds.), Phytochem Agri. 1993; 34: 171- 213.
- 525 54. Isman MB. Plant essential oils for pest and disease management. Crop Prot 2000; 19: 603–  
526 608. [https://doi.org/10.1016/S0261-2194\(00\)00079-X](https://doi.org/10.1016/S0261-2194(00)00079-X).
- 527 55. Jayakumar M, Ramachandran M, Krishnaveni T, Nattudurai N. Toxicity and biochemical  
528 effects of essential oils of *Anethum graveolens* L. and *Melaleuca cajuputi* Powell  
529 against *Rhyzopertha dominica* (F.) (Coleoptera: Bostrichidae). Int J Trop Insect Sci. 2020;  
530 <https://doi.org/10.1007/s42690-020-00359-6>
- 531 56. Wang JL, Li Y, Lei CL. Evaluation of monoterpenes for the control of *Tribolium castaneum*  
532 (Herbst) and *Sitophilus zeamais* Motschulsky. Nat Prod Res. 2009; 23: 1080–1088.  
533 <https://doi.org/10.1080/14786410802267759>.



- 534 57. Siddique S, Chaudhry MN. Repellency, fumigant and contact toxicities of essential oils of  
535 selected species from family Myrtaceae against *Tribolium castaneum*. J Medicinal Plants  
536 Res. 2013; 7(3): 126-139.
- 537 58. Maciel MV, Morais SM, Bevilaqua CML, Silva RA, Barros RS. et al. Chemical composition  
538 of eucalyptus spp. essential oils and their insecticidal effects on *Lutzomyia*  
539 *longipalpis*. Veterinary Parasitol. 2010; 167(1): 1-7.  
540 <https://doi.org/10.1016/j.vetpar.2009.09.053>.
- 541 59. Huang Y, Tan JMWL, Kini RM, Ho SH. Toxic and antifeedant action of nutmeg oil against  
542 *Tribolium castaneum* (Herbst) and *Sitophilus zeamais* Motsch. J Stored Prod Res. 1997;  
543 33: 289-298. [https://doi.org/10.1016/S0022-474X\(97\)00009-X](https://doi.org/10.1016/S0022-474X(97)00009-X).
- 544 60. Ho SH, Koh L, Ma Y, Huang Y, Sim KY. The oil of garlic, *Allium sativum* L.  
545 (Amaryllidaceae), as a potential grain protectant against *Tribolium castaneum* (Herbst) and  
546 *Sitophilus zeamais* Motsch. Postharvest Biol Technol. 1996; 9: 41-48.  
547 [https://doi.org/10.1016/0925-5214\(96\)00018-X](https://doi.org/10.1016/0925-5214(96)00018-X).
- 548 61. Mondal M, Khalequzzaman M. Ovicidal activity of essential oils against red flour beetle,  
549 *Tribolium castaneum* (Coleoptera: Tenebrionidae). J Bio-Sci. 2009; 17: 57-62.  
550 <https://doi.org/10.3329/jbs.v17i0.7102>.
- 551 62. Gurusubramanian G, Krishna SS. The effects of exposing eggs of four cotton insect pests to  
552 volatiles of *Allium sativum* (Liliaceae). Bull Entomol Res. 1996; 86(1): 29-31.  
553 DOI: <https://doi.org/10.1017/S0007485300052160>.

- 554 63. Ross DC, Brown TM. Inhibition of larval growth in *Spodoptera frugiperda* by sublethal  
555 dietary concentrations of insecticides. J Agric Food Chem. 1982; 30(1): 193-196.  
556 <https://doi.org/10.1021/jf00109a045>.
- 557 64. Chapman RF. The insects: structure and function. 4 edition, *Cambridge university press*.  
558 United States of America, New York, 1998.
- 559 65. Nathan SS, Choi MY, Seo HY, Paik CH, Kalivani K. et al. Effect of azadirachtin on  
560 acetylcholinesterase (AChE) activity and histology of the brown planthopper *Nilaparvata*  
561 *lugens* (Stål). Ecotoxicol Environ Saf. 2008; 70: 244-250.  
562 <https://doi.org/10.1016/j.ecoenv.2007.07.005>.
- 563 66. Maheshwari SS, Sehgal SS. Effect of tepa on nucleic acid and protein contents in developing  
564 red cotton bug, *Dysdercus koenigii* Fabr. Ind J Ent. 1981; 43(4): 341-347.
- 565 67. Reddy SS, Rao GM. Cytogenetic effects of agricultural chemicals. Cytologia. 1982; 47(2):  
566 257-267. <https://doi.org/10.1508/cytologia.47.257>.
- 567 68. Somasundaram P, Chockalingam S. Impact of chitin synthesis inhibitor diflubenzuron on the  
568 feeding physiology of *Papilio demoleus* (Lepidoptera: Papilionidae). Int J Tropical Insect  
569 Sci. 1988; 9(5); 613-616 <https://doi.org/10.1017/S1742758400005099>.
- 570 69. Nath BS, Suresh A, Varma BM, Kumar RPS. Changes in protein metabolism in hemolymph  
571 and fat body of the silkworm, *Bombyx mori* (Lepidoptera :Bombycidae) in response to  
572 organophosphorus insecticides toxicity. Ecotox Environ Safety. 1997; 36; 169-173  
573 <https://doi.org/10.1006/eesa.1996.1504>.

- 574 70. Baskar K, Muthu C, Ignacimuthu S. Effect of pectolinarigenin, a flavonoid from  
575 *Clerodendrum phlomidis* L. on total protein, glutathione S- transferase and esterase  
576 activities of *Earias vittella* Fab. and *Helicoverpa armigera* Hub. *Phytoparasitica*. 2014; 42:  
577 323-331.
- 578 71. Baskar K, Ignacimuthu S, Jayakumar M. Toxic Effects of *Couroupita guianensis* against  
579 *Spodoptera litura* (Fabricius) (Lepidoptera: Noctuidae). *Neotrop Entomol*. 2015; 44; 84–  
580 91.
- 581 72. Baskar K, Ananthi J, Ignacimuthu S. Toxic effect of *Solanum xanthocarpum* Sch & Wendle on  
582 *Helicoverpa armigera* (Hub.) and *Culex quinquefasciatus* (Say.). *Environ Sci Pollu Res*.  
583 2018; 25; 2774-2782.
- 584 73. Sami AJ, Bilal S, Khalid M, Nazir MT, Shakoori ARA. Comparative Study of Inhibitory  
585 Properties of Saponins (derived from *Azadirachta indica*) for Acetylcholinesterase of  
586 *Tribolium castaneum* and *Apis mellifera*. *Pakistan J Zool*. 2018; 50(2): 725-733. DOI:  
587 10.17582/journal.pjz/2018.50.2.725.733.
- 588 74. Boyer S, Zhang H, Lempérière G. A review of control methods and resistance mechanisms in  
589 stored-product insects. *Bull Entomol Res*. 2012; 102(2): 213-229.  
590 <https://doi.org/10.1017/S0007485311000654>.
- 591 75. Lindroth RL. Adaptations of quaking aspen for defense against damage by herbivores and  
592 related environmental agents. *USDA Forest Service Proceedings* 2001, RMRS-P-18, 273–  
593 284.

- 594 76. Cai QN, Zhang QW, Cheo M. Contribution of indole alkaloids to *Sitobion avenae* (F.)  
595 resistance in wheat. J Appl Entomol. 2004; 128: 517–521. [https://doi.org/10.1111/j.1439-](https://doi.org/10.1111/j.1439-0418.2004.00770.x)  
596 [0418.2004.00770.x](https://doi.org/10.1111/j.1439-0418.2004.00770.x)
- 597 77. Linhardt K, Walter K. Phosphatases, in: H.U. Bergmeyer (Ed.), Methods of Enzymatic  
598 Analysis, Academic Press, New York, 1965; pp.787.
- 599 78. Sridhara S, Bhat JV. Alkaline and acid phosphatases of the silkworm, *Bombyx mori* L. J Insect  
600 Physiol. 1963; 9: 693–701. [https://doi.org/10.1016/0022-1910\(63\)90012-X](https://doi.org/10.1016/0022-1910(63)90012-X).
- 601 79. Srivastava JV, Saxena SC. On the alkaline and acid phosphatase in the alimentary tract of  
602 *Periplaneta americana* L. J Appl Entmol Zool. 1963; 2: 85–92.  
603 <https://doi.org/10.1303/aez.2.85>.
- 604 80. Csikos G, Sass M. Changes of acid phosphatase content and activity in the fat body and the  
605 hemolymph of the flesh fly *Neobellieria* (Sarcophaga) bullata during metamorphosis. Arch  
606 Insect Biochem Physiol. 1997; 34: 369–390. [https://doi.org/10.1002/\(SICI\)1520-](https://doi.org/10.1002/(SICI)1520-6327(1997)34:3<369::AID-ARCH10>3.0.CO;2-8)  
607 [6327\(1997\)34:3<369::AID-ARCH10>3.0.CO;2-8](https://doi.org/10.1002/(SICI)1520-6327(1997)34:3<369::AID-ARCH10>3.0.CO;2-8).
- 608 81. Ferreira C, Terra WR. Intracellular distribution of hydrolases in midgut caeca cells from an  
609 insect with emphasis on plasma membrane-bound enzymes. Comp Biochem Physiol. 1980;  
610 66B: 467–473. [https://doi.org/10.1016/0305-0491\(80\)90235-7](https://doi.org/10.1016/0305-0491(80)90235-7).
- 611 82. Bai C, Yi SX, Degheele D. Phosphatases in last instar larvae of the African armyworm,  
612 *Spodoptera exempta* (Walker) (Lepidoptera: Noctuidae). Med Fac Landbouw Univ Gent.  
613 1993; 58: 317–327.

- 614 83. Wolfersberger MG. Enzymology of plasma membranes of insect intestinal cells. *Am Zool.*  
615 1994; 24: 187–197 <https://doi.org/10.1093/icb/24.1.187>
- 616 84. Nathan SS, Choi MY, Paik CH, Seo HY. Food consumption, utilization and detoxification  
617 enzyme activity of the rice leaf folder larvae after treatment with *Dysoxylum triterpenes*.  
618 *Pestic Biochem Physiol.* 2007; 88: 260–267. <https://doi.org/10.1016/j.pestbp.2006.12.004>.
- 619 85. Nathan SS. Effects of *Melia azedarach* on nutritional physiology and enzyme activities of the  
620 rice leaf folder *Cnaphalocrocis medinalis* (Guenée) (Lepidoptera: Pyralidae). *Pestic*  
621 *Biochem Physiol.* 2006; 84: 98–108. <https://doi.org/10.1016/j.pestbp.2005.05.006>.
- 622 86. Kranthi KR. Insecticide Resistance -Monitoring, Mechanisms and Management Manual'.  
623 Published by CICR, Nagpur, India and ICAC, Washington, 2005.
- 624 87. Shojaei A, Talebi K, Sharifian I, Ahsaei SM. Evaluation of detoxifying enzymes of *Tribolium*  
625 *castaneum* and *Tribolium confusum* (Col.: Tenebrionidae) exposed to essential oil of  
626 *Artemisia dracuncululus* L. *Biharean Biologist* 2017; 11(1): 5-9.

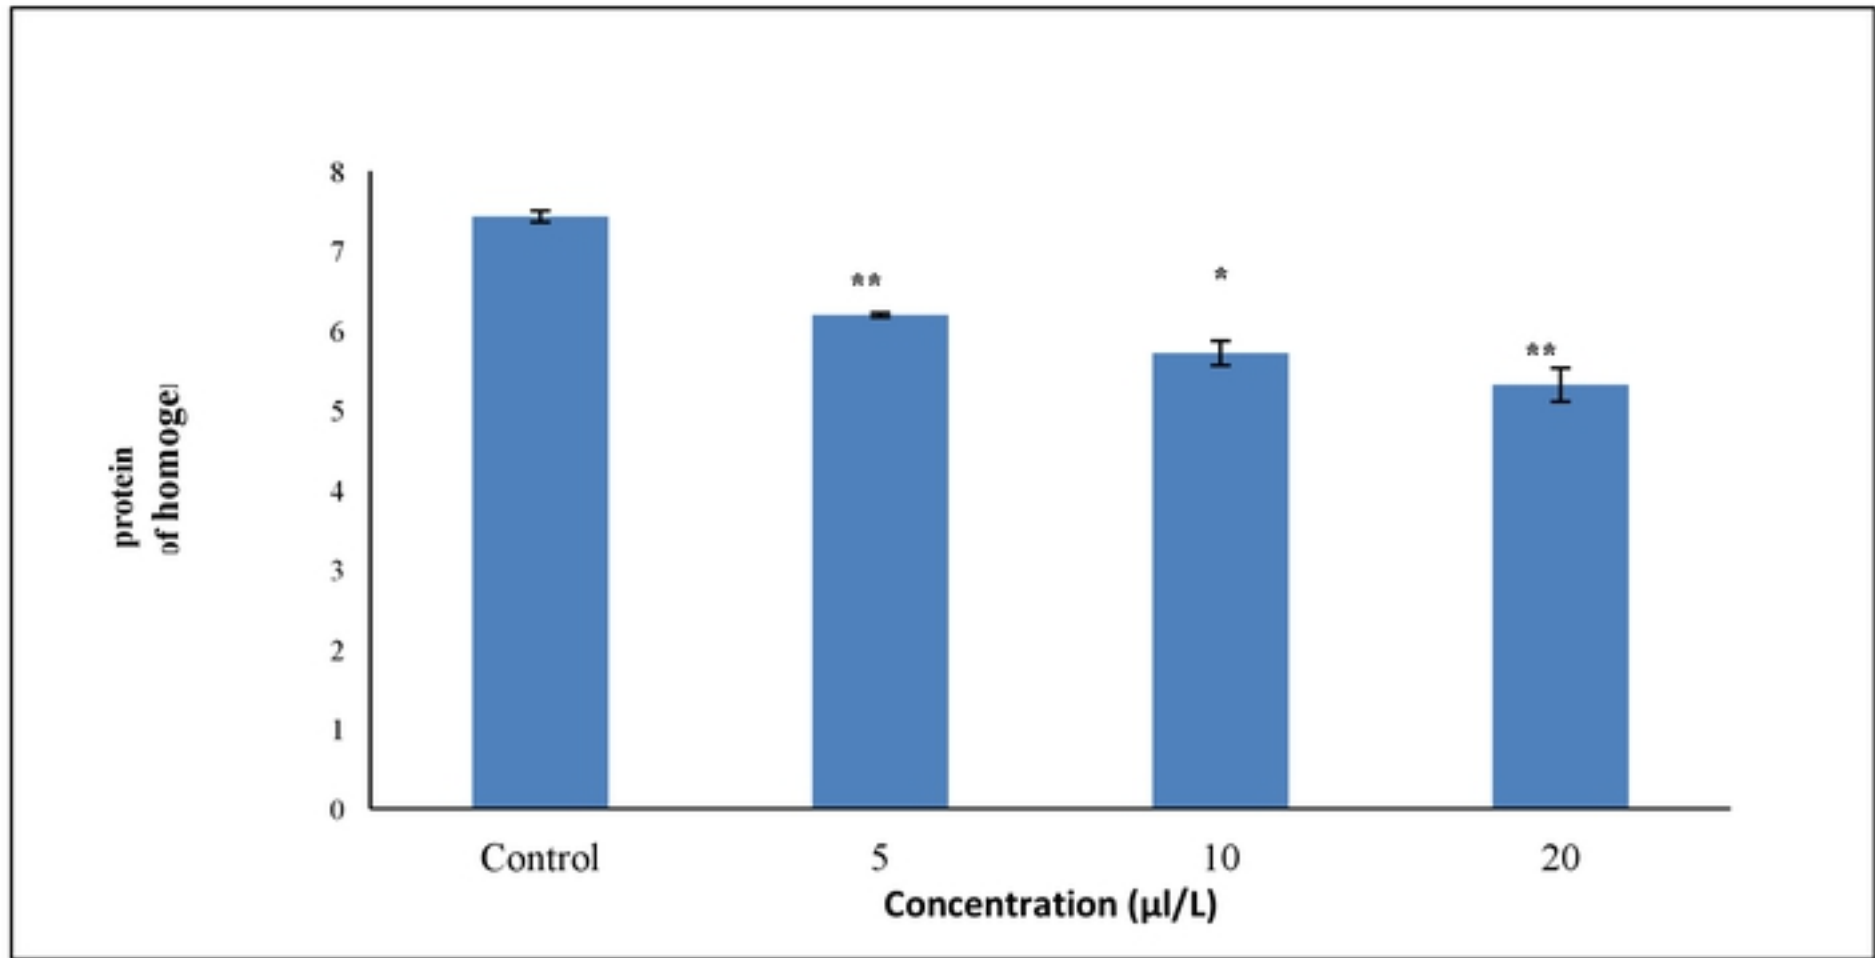

Mean of Three replication  $\pm$  SE; \*- significant by Student's t-test; \*\*-Highly significant by Student's t-test  
**Fig 1a.** Total protein level of *T. castaneum* adult after treatment with essential oil of *C. citrimus*

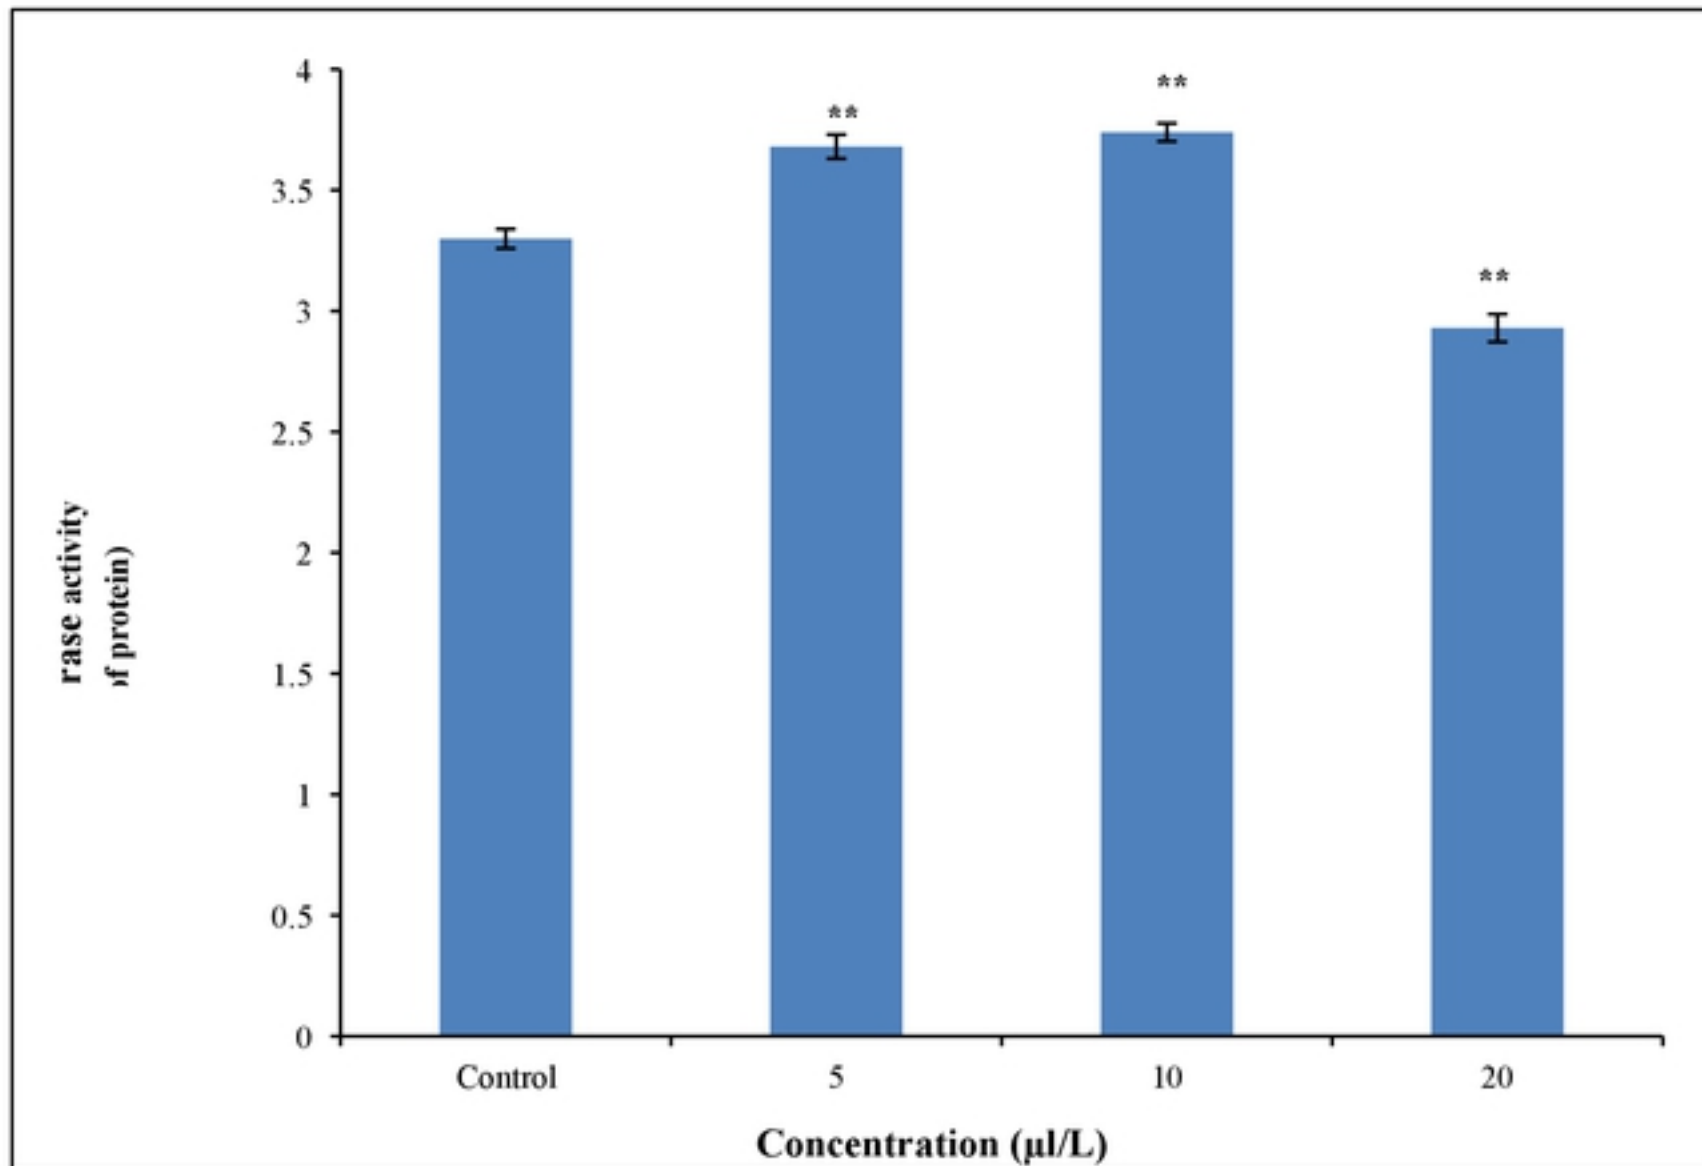

Mean of Three replication  $\pm$  SE ; \*- significant by Student's t-test; \*\*-Highly significant by Student's t-test  
**Fig 1b. Acetylcholinesterase activity of adult (mM ACT released/min/mg protein) *T. castaneum* adult after treatment with essential oil of *C. citrimus***

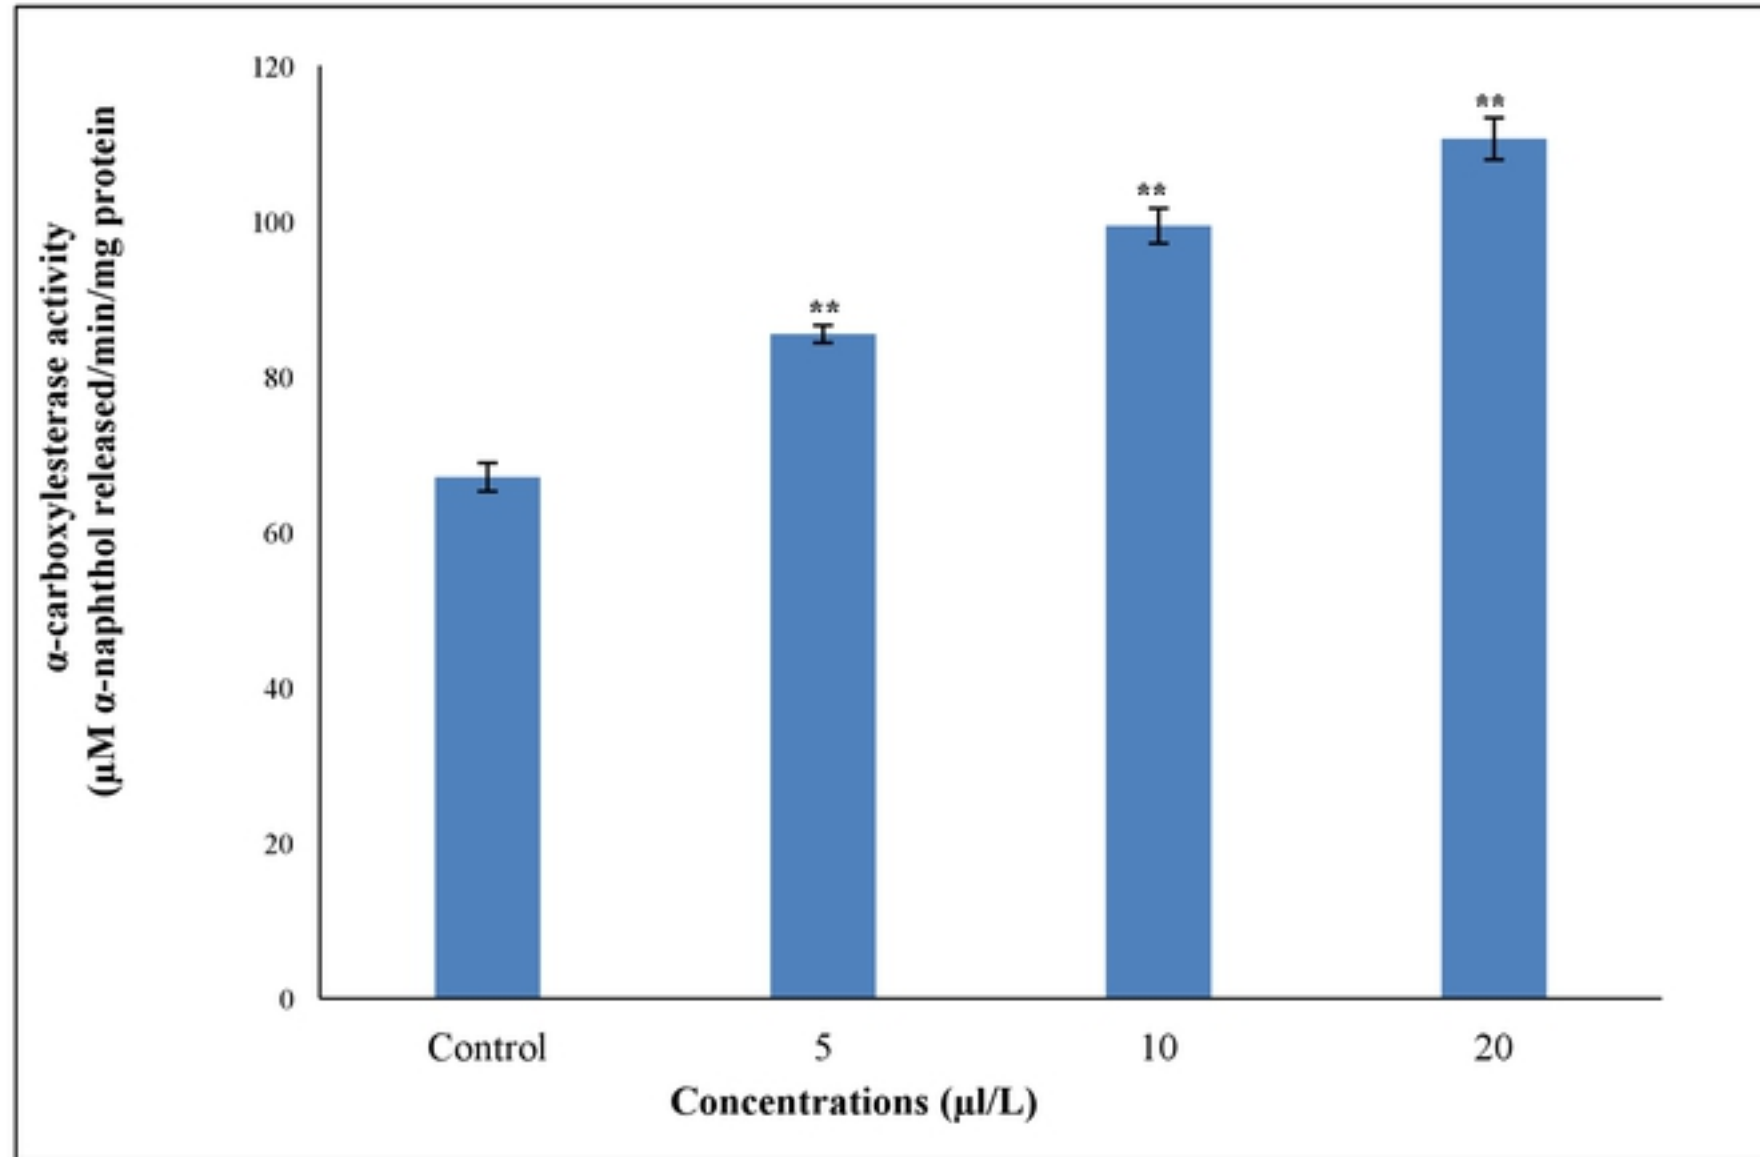

Mean of Three replication  $\pm$  SE; \*- significant by Student's t-test; \*\*-Highly significant by Student's t-test  
**Fig 1c.  $\alpha$ -Carboxylesterase activity ( $\mu$ M  $\alpha$ -naphthol released/min/mg protein) of *T. castaneum* adult after treatment with essential oil of *C. citrimus***



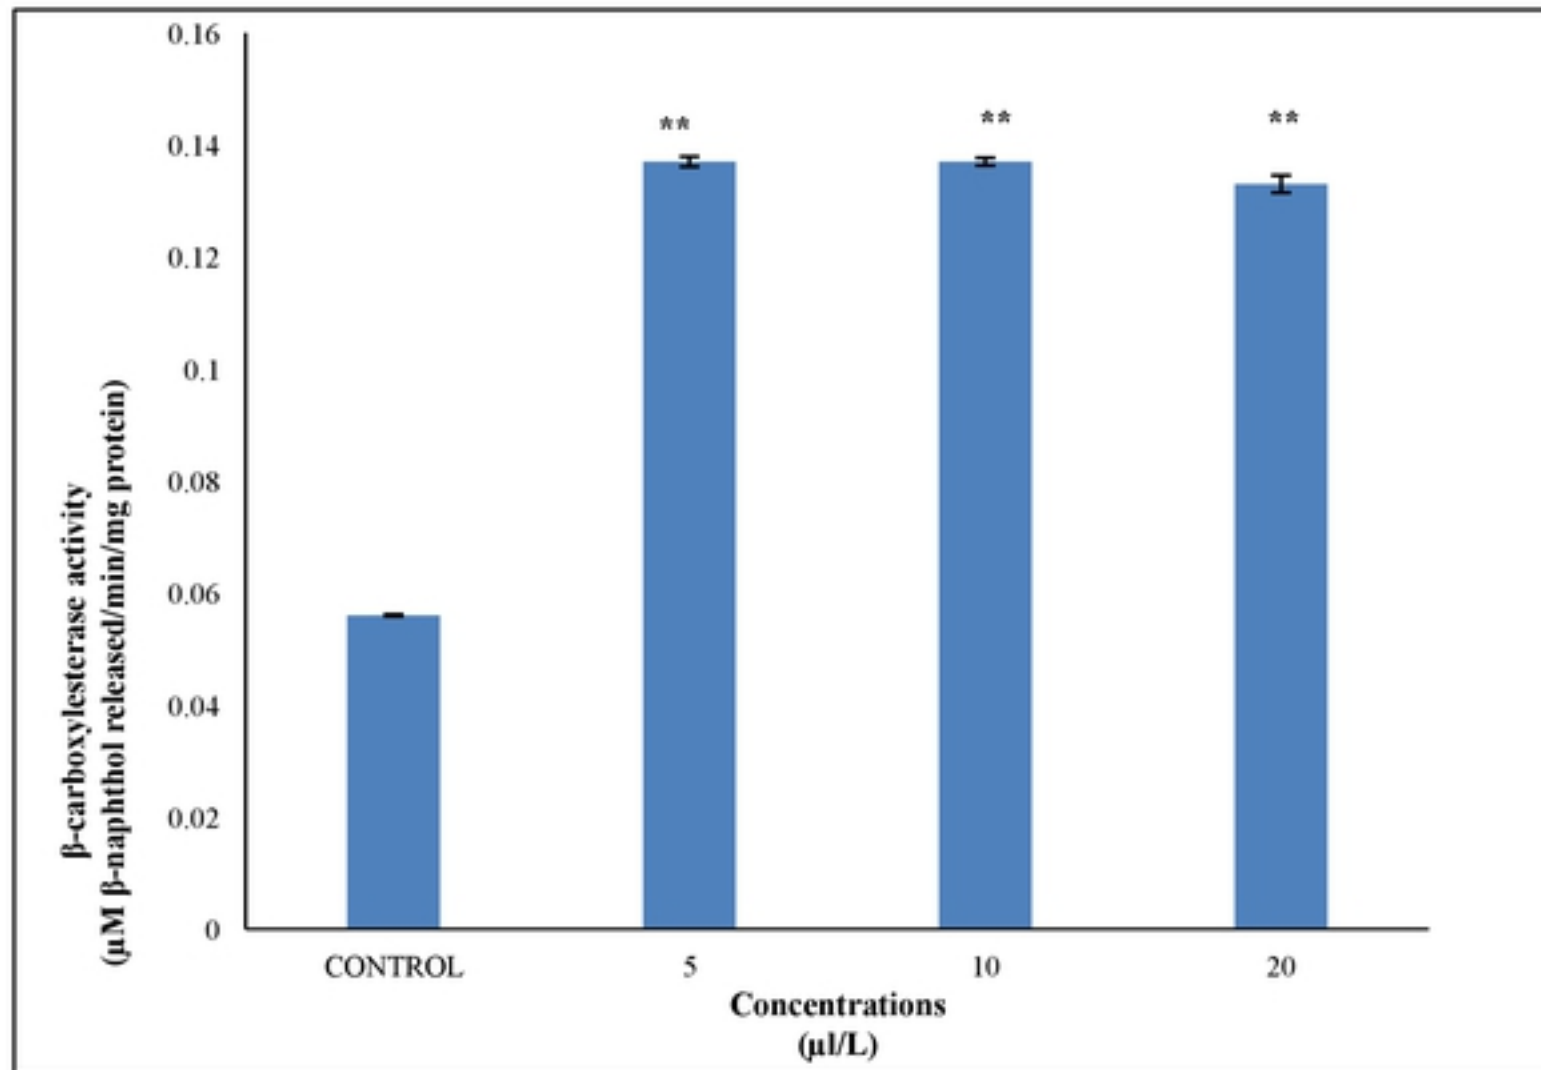

Mean of Three replication  $\pm$  SE; \*- significant by Student's t-test; \*\*-Highly significant by Student's t-test

**Fig 1d.  $\beta$ -Carboxylesterase activity ( $\mu$ M  $\beta$ -naphthol released/min/mg protein) of *T. castaneum* adult after treatment with essential oil of *C. citrinus***

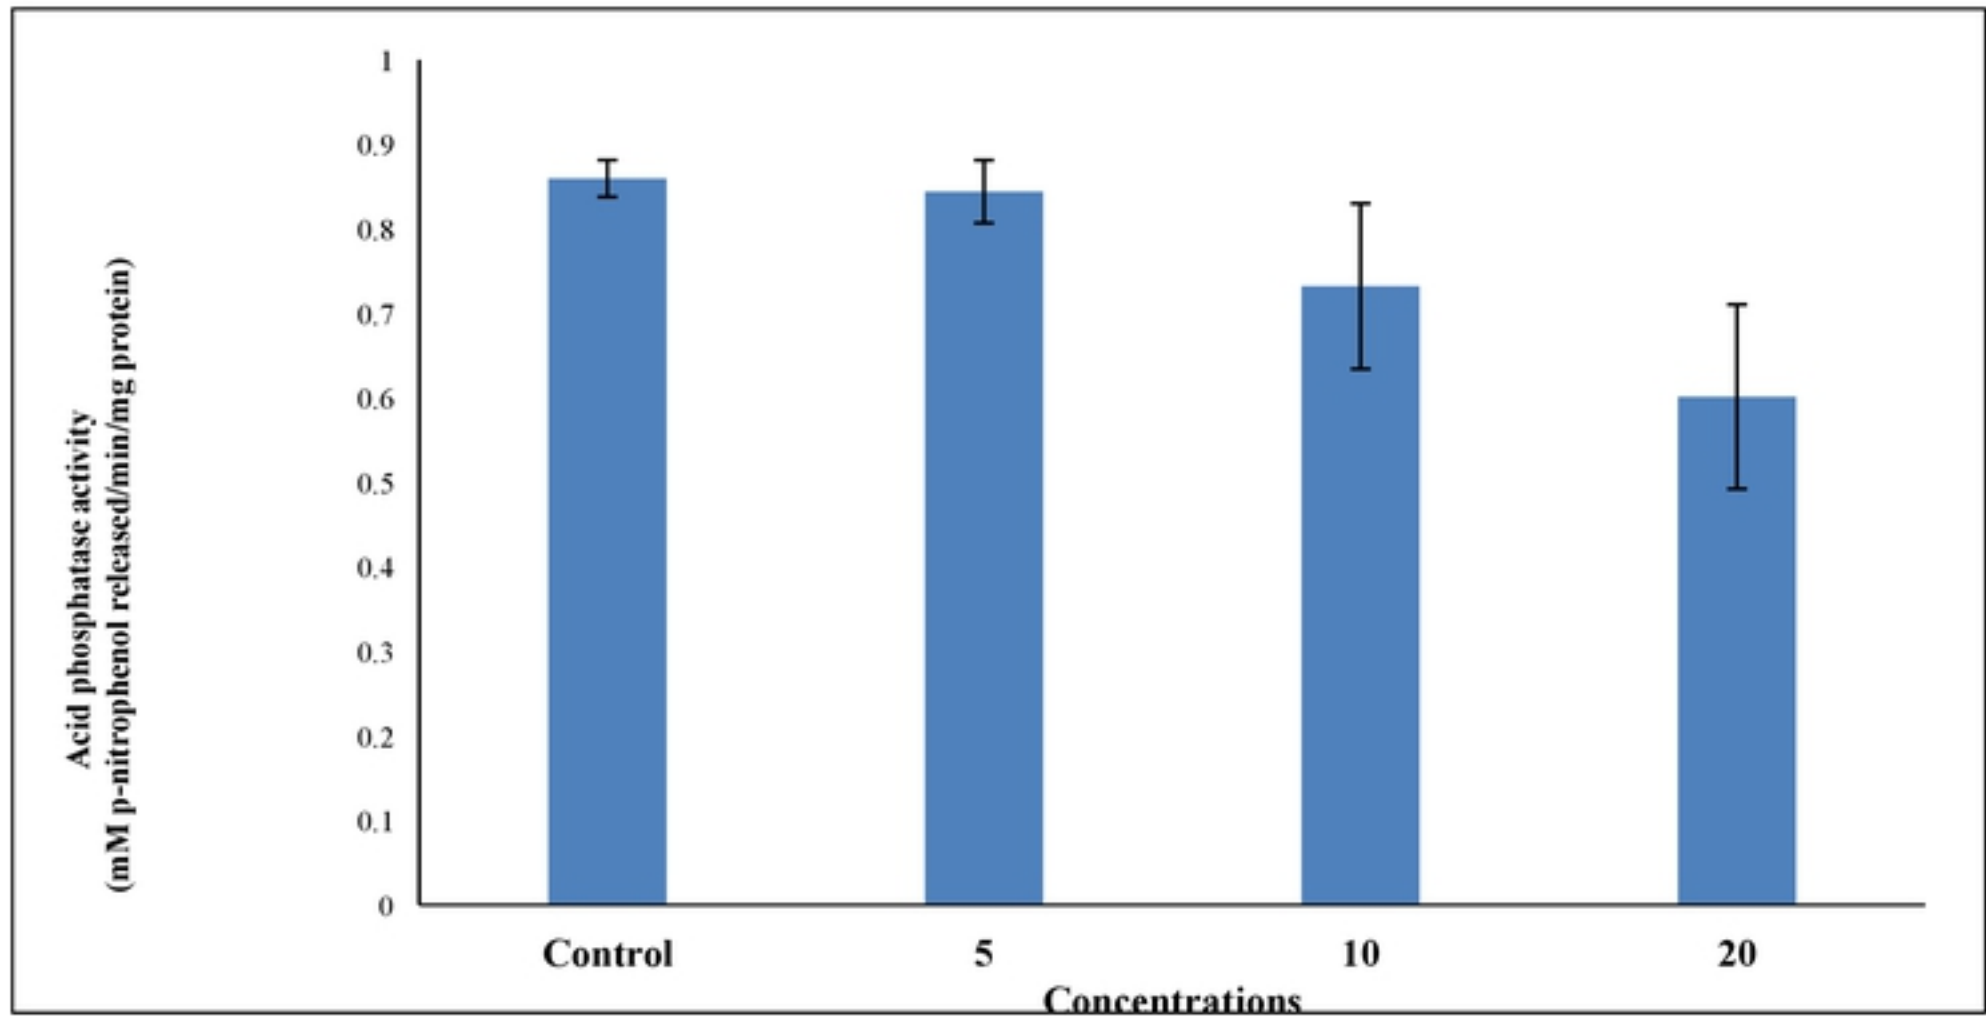

Mean of Three replication  $\pm$  SE; Not significant by Student's t-test

**Fig 1e.** Acid phosphatase (mM p-nitrophenol released/min/mg protein) of *T. castaneum* adult after treatment with essential oil of *C. citrimus*

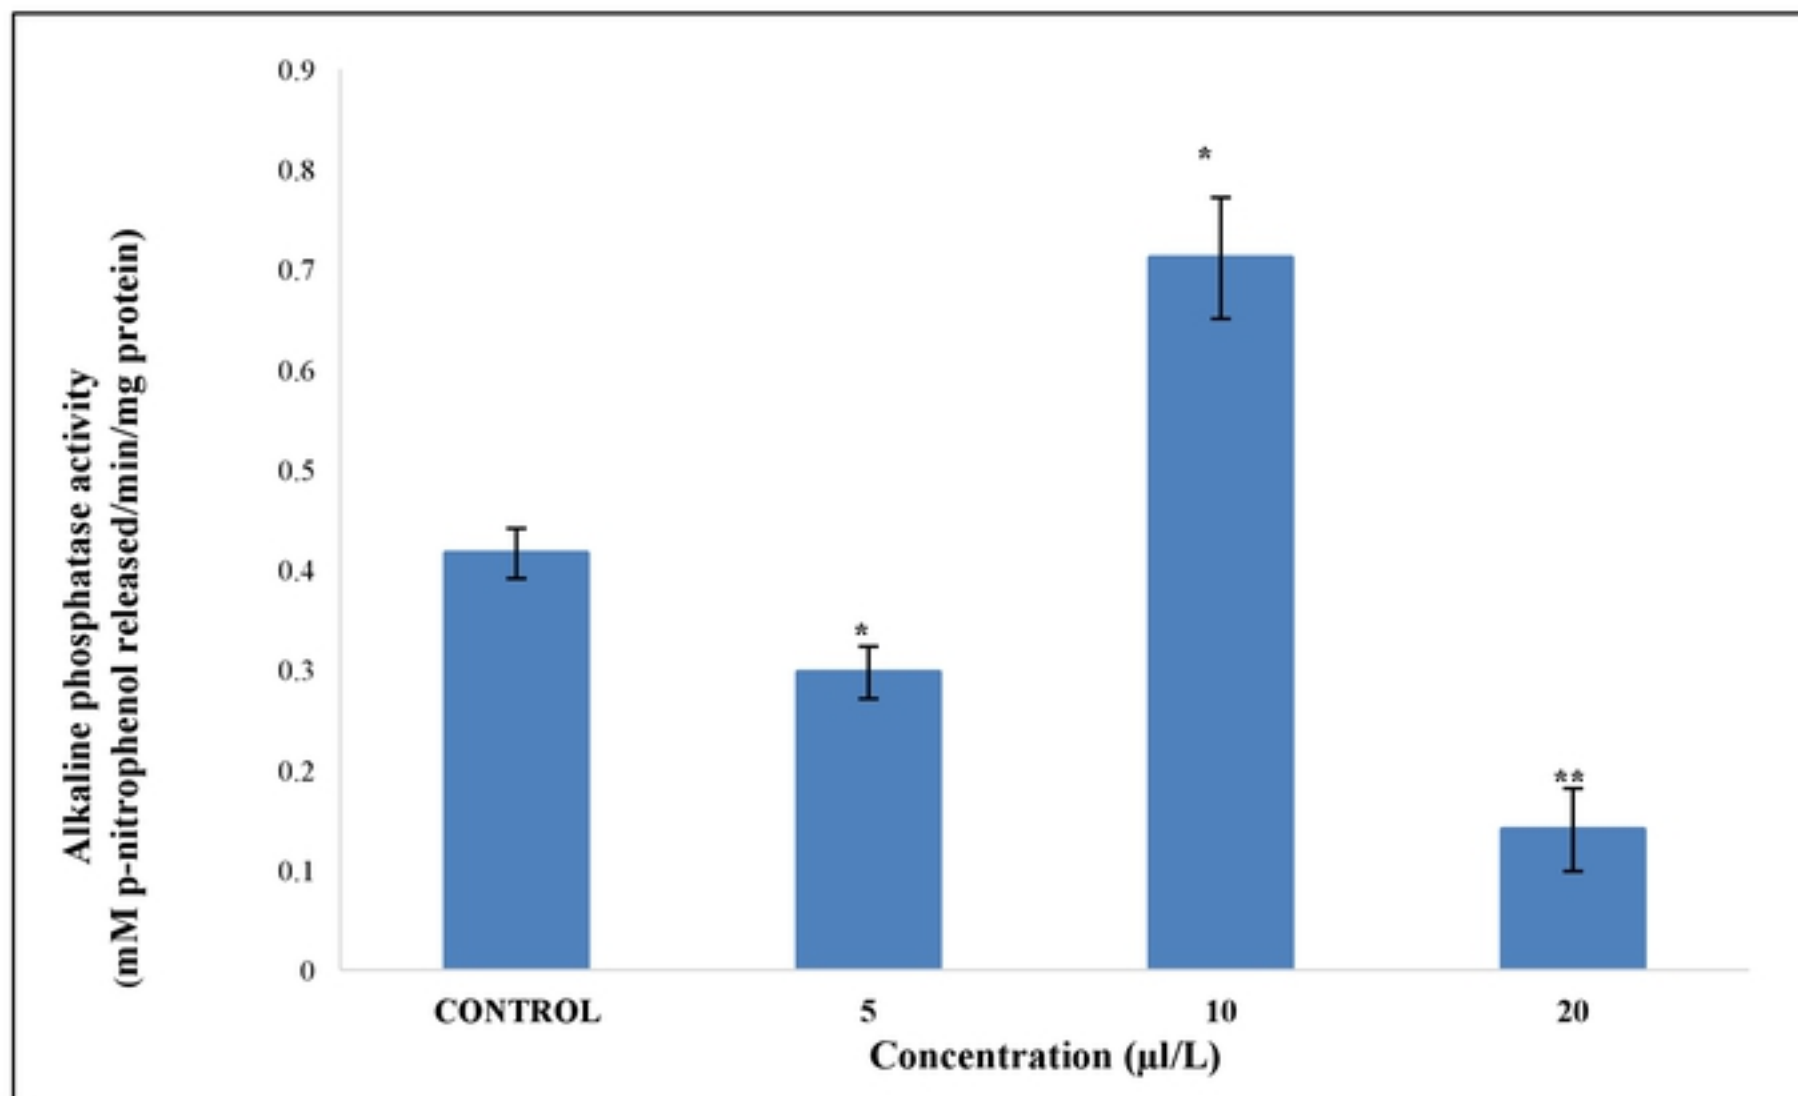

Mean of Three replication  $\pm$  SE; \*- significant by Student's t-test; \*\*-Highly significant by Student's t-test  
**Fig 1f. Alkaline phosphatase(mM p-nitrophenol released/min/mg protein) of *T. castaneum* adult after treatment with essential oil of *C. citrimus***

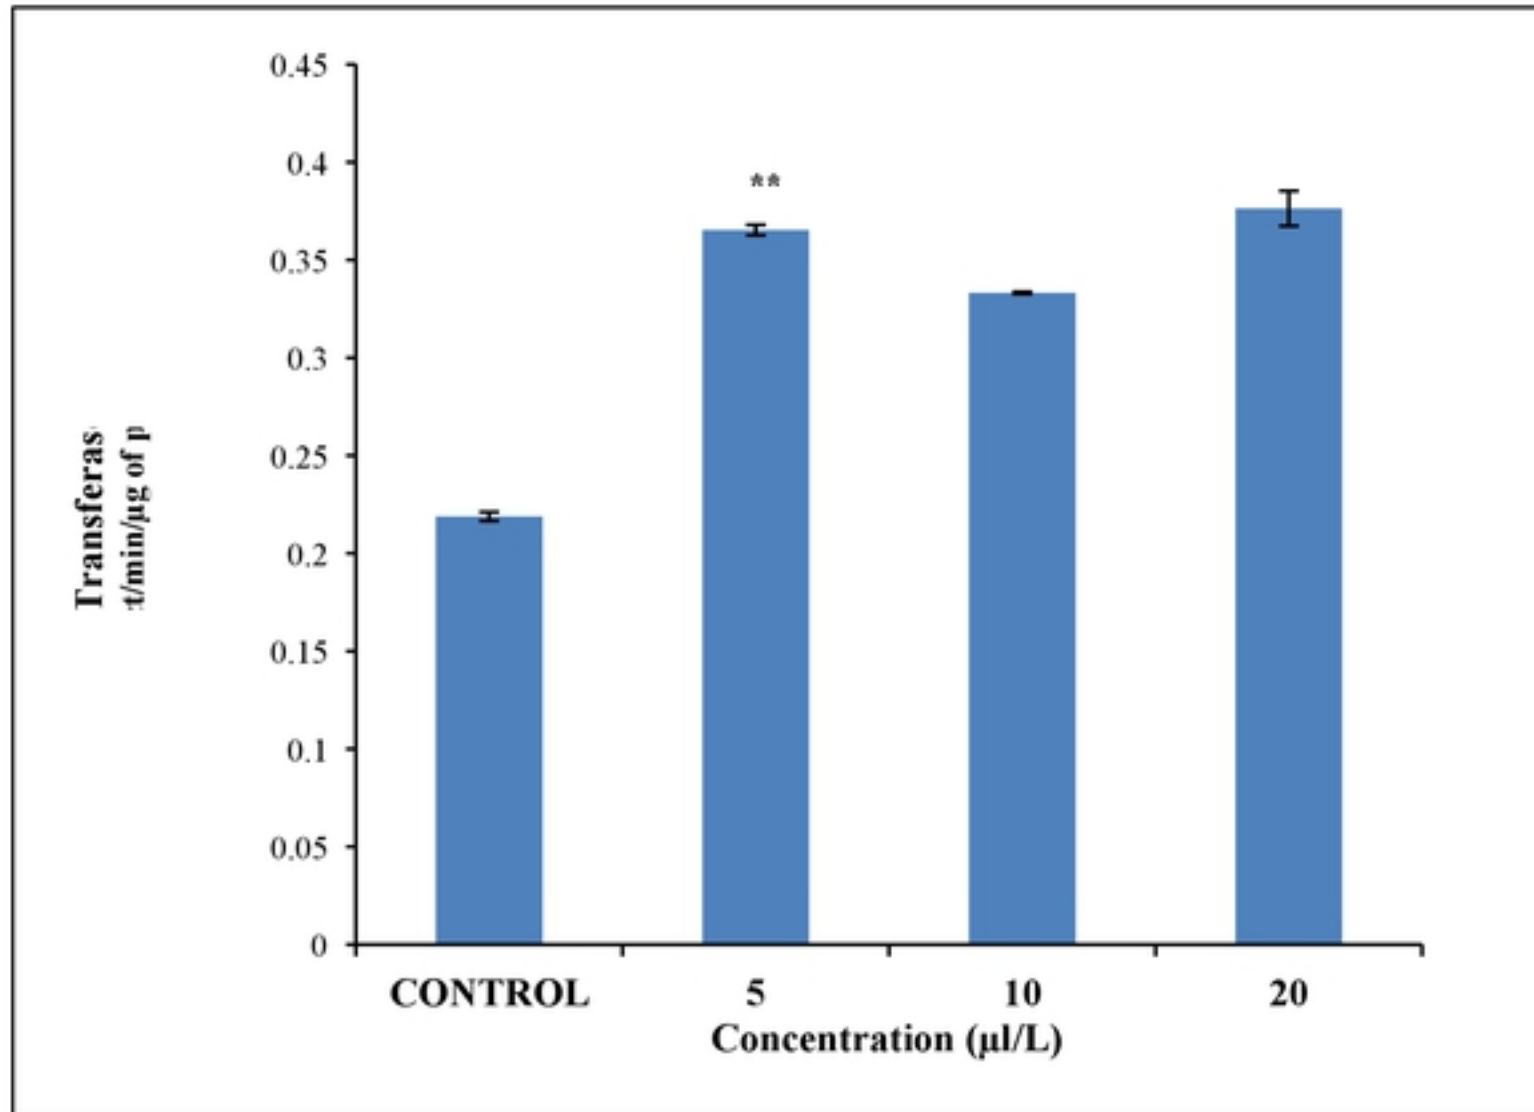

Mean of Three replication  $\pm$  SE' \*- significant by Student's t-test; \*\*-Highly significant by Student's t-test

**Fig 1g. Glutathione-S-Transferase activity (CDNB product/min/mg protein) of *T. castaneum* adult after treatment with essential oil of *C. citrimus***

## PROTEIN NATIVE PAGE

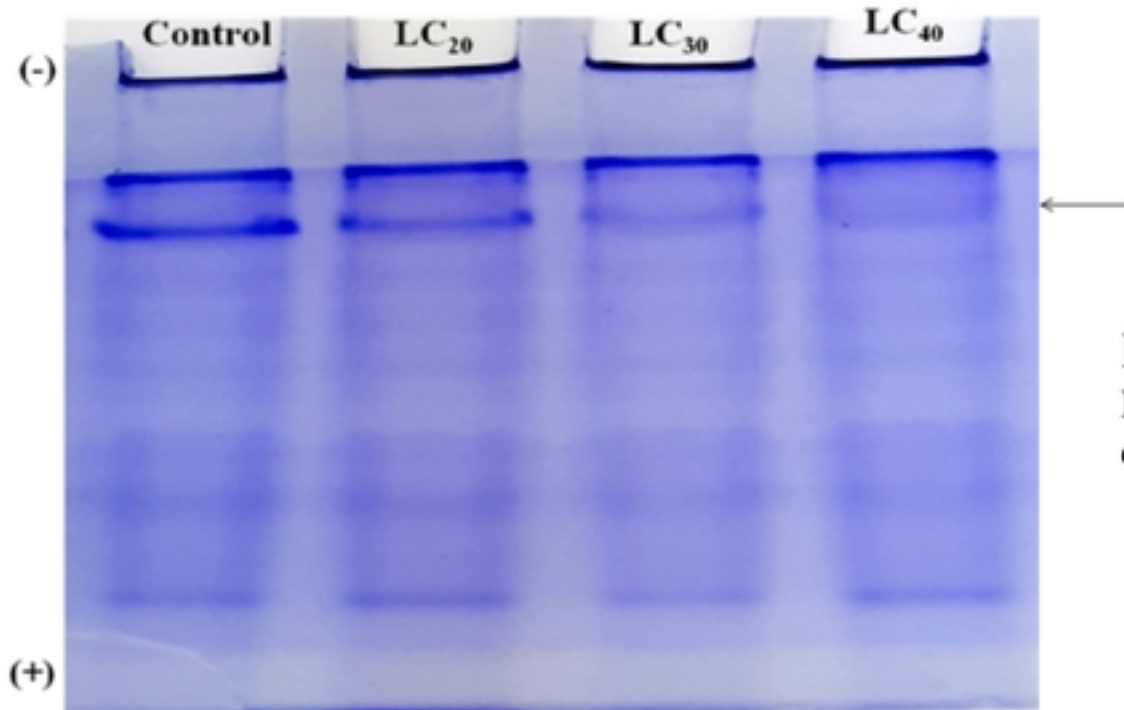

**Fig 2a.** Qualitative analysis of total protein in native PAGE, of *T. castaneum* adult after treatment with essential oil of *C. citrimus*

## $\beta$ -Carboxylesterase

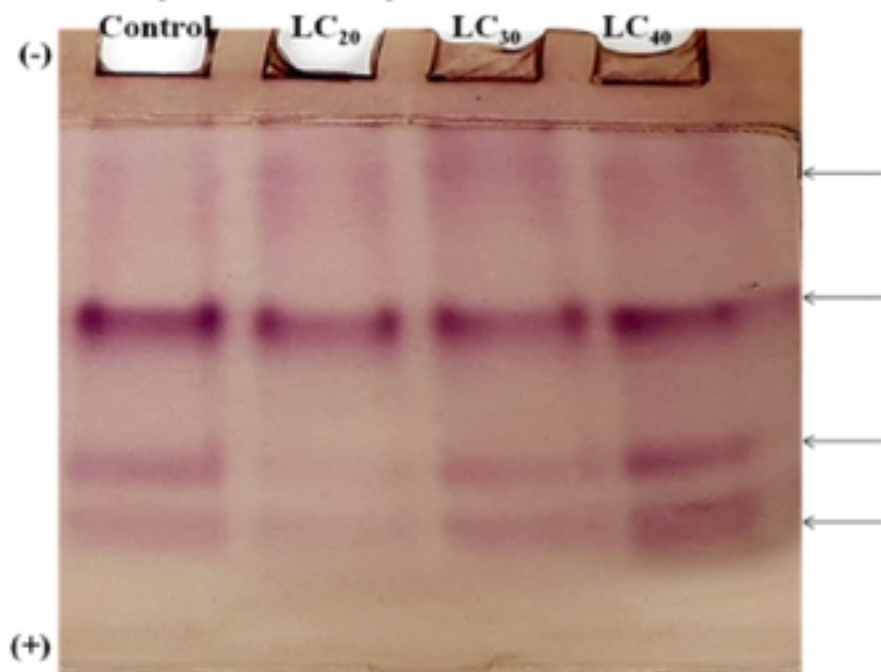

**Fig 2b.** Qualitative analysis of isoenzyme of  $\beta$ -Carboxylesterases of *T. castaneum* adult after treatment with essential oil of *C. citrimus*

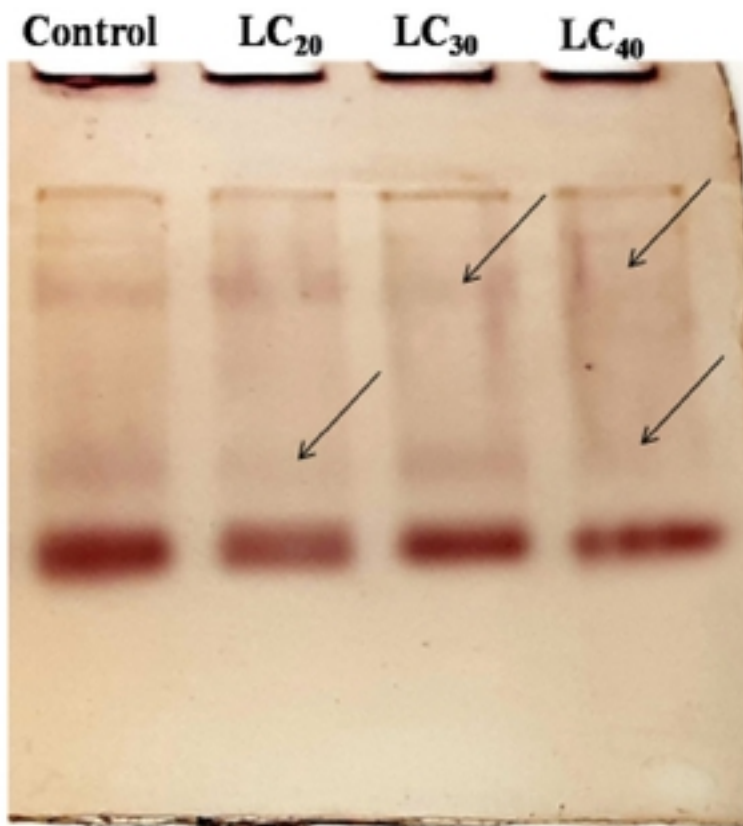

**Fig 2c. Qualitative analysis of acid phosphatases of *T. castaneum* adult after treatment with essential oil of *C. citrimus***

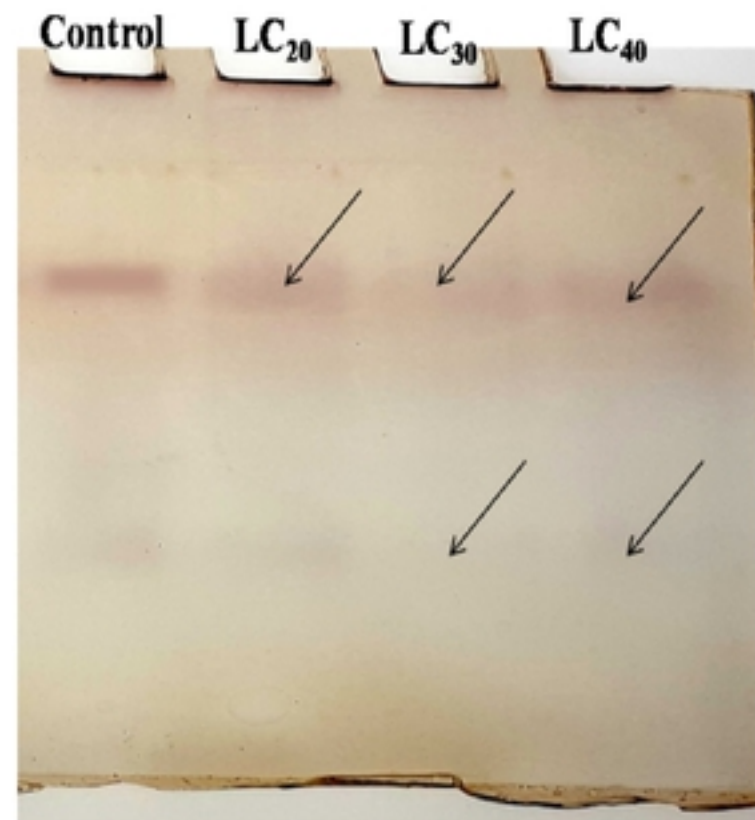

**Fig 2d. Qualitative analysis of alkaline phosphatases *T. castaneum* adult after treatment with essential oil of *C. citrimus***

**Table 1. Phytochemical Constituents and composition (%) of essential oil from *Callistemon citrinus***

| Peak No. | Compounds                                                   | Retention Time (min) | Area% |
|----------|-------------------------------------------------------------|----------------------|-------|
| 1        | alpha.-Pinene                                               | 5.690                | 17.46 |
| 2        | Camphene                                                    | 5.955                | 0.59  |
| 3        | beta.-Pinene                                                | 6.412                | 5.83  |
| 4        | beta.-Myrcene                                               | 6.627                | 3.22  |
| 5        | beta.-Pinene                                                | 6.852                | 0.93  |
| 6        | Eucalyptol                                                  | 7.315                | 40.44 |
| 7        | gamma.-Terpinene                                            | 7.738                | 2.32  |
| 8        | .alpha.-Methyl-.alpha.-[4-methyl-3-pentenyl]oxiranemethanol | 7.936                | 0.92  |
| 9        | 2-Carene                                                    | 8.165                | 0.96  |
| 10       | Linalool                                                    | 8.419                | 27.34 |

bioRxiv preprint doi: <https://doi.org/10.1101/2021.01.05.425383>; this version posted January 5, 2021. The copyright holder for this preprint (which was not certified by peer review) is the author/funder, who has granted bioRxiv a license to display the preprint in perpetuity. It is made available under a [CC-BY 4.0 International license](https://creativecommons.org/licenses/by/4.0/).

**Table 2a. Fumigation toxicity (%) of essential oil from *C. citrinus* against *T. castaneum*.**

| Concentrations (µL/L) | Period of study (hrs)   |                        |                         |                         |                         |
|-----------------------|-------------------------|------------------------|-------------------------|-------------------------|-------------------------|
|                       | 3                       | 6                      | 9                       | 12                      | 24                      |
| 40                    | 0.0±0.0 <sup>a</sup>    | 12.0±2.00 <sup>a</sup> | 30.0±3.16 <sup>a</sup>  | 36.0±2.45 <sup>a</sup>  | 50.0±1.75 <sup>a</sup>  |
| 80                    | 0.0±0.0 <sup>a</sup>    | 16.0±2.45 <sup>a</sup> | 58.0±2.00 <sup>b</sup>  | 68.0±3.74 <sup>b</sup>  | 81.3±1.93 <sup>b</sup>  |
| 120                   | 0.0±0.0 <sup>a</sup>    | 30.0±3.16 <sup>b</sup> | 72.0±3.74 <sup>c</sup>  | 82.0±2.00 <sup>c</sup>  | 91.6±2.12 <sup>c</sup>  |
| 160                   | 8.0±3.74 <sup>b</sup>   | 48.0±3.74 <sup>c</sup> | 100.0±0.00 <sup>d</sup> | 100.0±0.00 <sup>d</sup> | 100.0±0.00 <sup>d</sup> |
| 200                   | 22.0 ±2.00 <sup>b</sup> | 64.0±2.45 <sup>d</sup> | 100.0±0.00 <sup>d</sup> | 100.0±0.00 <sup>d</sup> | 100.0±0.00 <sup>d</sup> |
| Shapiro-Wilk test     | ns                      | ns                     | ns                      | ns                      | ns                      |

Mean of five replication ± SE

**Table 2b. Larvicidal activity (%) of essential oil from *C. citrinus* against *T. castaneum***

| Concentrations ( $\mu\text{L/L}$ ) | Period of study (hrs) |                               |                                 |                                |                                |                               |                               |
|------------------------------------|-----------------------|-------------------------------|---------------------------------|--------------------------------|--------------------------------|-------------------------------|-------------------------------|
|                                    | 3                     | 6                             | 9                               | 12                             | 24                             | 36                            | 48                            |
| 40                                 | 0.0 $\pm$ 0.0         | 0.0 $\pm$ 0.0 <sup>a</sup>    | 2.0 $\pm$ 2.00 <sup>a</sup>     | 4.0 $\pm$ 2.45 <sup>a</sup>    | 6.0 $\pm$ 2.45 <sup>a</sup>    | 10.2 $\pm$ 3.16 <sup>a</sup>  | 16.9 $\pm$ 2.38 <sup>a</sup>  |
| 80                                 | 0.0 $\pm$ 0.0         | 0.0 $\pm$ 0.0 <sup>a</sup>    | 4.0 $\pm$ 2.45 <sup>ab</sup>    | 14.0 $\pm$ 2.45 <sup>b</sup>   | 18.2 $\pm$ 3.62 <sup>b</sup>   | 22.9 $\pm$ 1.84 <sup>b</sup>  | 31.6 $\pm$ 3.99 <sup>b</sup>  |
| 120                                | 0.0 $\pm$ 0.0         | 0.0 $\pm$ 0.0 <sup>a</sup>    | 6.0 $\pm$ 2.45 <sup>abc</sup>   | 18.0 $\pm$ 3.74 <sup>bc</sup>  | 22.4 $\pm$ 1.93 <sup>bc</sup>  | 26.9 $\pm$ 3.69 <sup>b</sup>  | 42.2 $\pm$ 3.76 <sup>bc</sup> |
| 160                                | 0.0 $\pm$ 0.0         | 6.0 $\pm$ 2.45 <sup>abc</sup> | 10.0 $\pm$ 3.16 <sup>abcd</sup> | 22.0 $\pm$ 2.00 <sup>bcd</sup> | 26.2 $\pm$ 3.77 <sup>bc</sup>  | 31.1 $\pm$ 2.87 <sup>bc</sup> | 50.9 $\pm$ 3.07 <sup>c</sup>  |
| 200                                | 0.0 $\pm$ 0.0         | 8.0 $\pm$ 2.00 <sup>bc</sup>  | 14.0 $\pm$ 2.45 <sup>bcd</sup>  | 26.0 $\pm$ 2.45 <sup>cde</sup> | 30.4 $\pm$ 2.82 <sup>bcd</sup> | 35.1 $\pm$ 3.47 <sup>bc</sup> | 55.3 $\pm$ 3.85 <sup>c</sup>  |
| 240                                | 0.0 $\pm$ 0.0         | 12.0 $\pm$ 2.00 <sup>cd</sup> | 16.0 $\pm$ 2.45 <sup>cde</sup>  | 30.0 $\pm$ 3.16 <sup>de</sup>  | 34.7 $\pm$ 2.26 <sup>cd</sup>  | 41.8 $\pm$ 1.09 <sup>cd</sup> | 70.4 $\pm$ 3.39 <sup>d</sup>  |
| 280                                | 0.0 $\pm$ 0.0         | 14.0 $\pm$ 2.45 <sup>cd</sup> | 20.0 $\pm$ 3.16 <sup>dc</sup>   | 36.0 $\pm$ 2.45 <sup>ef</sup>  | 40.7 $\pm$ 2.66 <sup>de</sup>  | 47.8 $\pm$ 3.34 <sup>d</sup>  | 80.9 $\pm$ 2.06 <sup>d</sup>  |
| 320                                | 0.0 $\pm$ 0.0         | 18.0 $\pm$ 3.74 <sup>d</sup>  | 26.0 $\pm$ 2.45 <sup>e</sup>    | 42.0 $\pm$ 2.00 <sup>f</sup>   | 49.1 $\pm$ 2.51 <sup>e</sup>   | 64.7 $\pm$ 2.00 <sup>e</sup>  | 95.8 $\pm$ 2.59 <sup>e</sup>  |
| Shapiro Wilk test                  | s                     | s                             | s                               | s                              | s                              | s                             | s                             |

bioRxiv preprint doi: <https://doi.org/10.1101/2021.01.05.425383>; this version posted January 5, 2021. The copyright holder for this preprint (which was not certified by peer review) is the author/funder, who has granted bioRxiv a license to display the preprint in perpetuity. It is made available under aCC-BY 4.0 International license.

Mean of five replication  $\pm$  SE

**Table 2c. Lethal concentration of essential oil from *C. citrinus* against *T. castaneum* adult and larvae**

| Stage of the insect    | LC <sub>50</sub> ( $\mu\text{L/L}$ ) | 95% Feducial level |        | LC <sub>90</sub> ( $\mu\text{L/L}$ ) | 95% Feducial level |        | Chi-square |
|------------------------|--------------------------------------|--------------------|--------|--------------------------------------|--------------------|--------|------------|
|                        |                                      | Lower              | Upper  |                                      | Lower              | Upper  |            |
| 24 hrs after treatment |                                      |                    |        |                                      |                    |        |            |
| Adult                  | 37.05                                | 14.09              | 51.02  | 102.82                               | 89.70              | 123.41 | 3.74       |
| 48 hrs after treatment |                                      |                    |        |                                      |                    |        |            |
| Larva                  | 144.31                               | 123.32             | 162.85 | 321.62                               | 289.44             | 369.08 | 11.01      |

**Table 3: Repellent activity (%) of essential oil from *C. citrinus* against *T. castaneum***

| Concentrations ( $\mu\text{L/L}$ ) | Period of study (hrs)       |                             |                             |                             |                             |                              |
|------------------------------------|-----------------------------|-----------------------------|-----------------------------|-----------------------------|-----------------------------|------------------------------|
|                                    | 2                           | 4                           | 6                           | 12                          | 24                          | 24                           |
| Larvae                             |                             |                             |                             |                             |                             | Adult                        |
| 5                                  | 24.3 $\pm$ 2.9 <sup>a</sup> | 24.3 $\pm$ 2.9 <sup>a</sup> | 25.3 $\pm$ 3.6 <sup>a</sup> | 26.3 $\pm$ 3.9 <sup>a</sup> | 30.5 $\pm$ 3.1 <sup>a</sup> | 31.1 $\pm$ 1.95 <sup>a</sup> |
| 10                                 | 40.9 $\pm$ 2.1 <sup>b</sup> | 41.4 $\pm$ 1.7 <sup>b</sup> | 41.4 $\pm$ 1.7 <sup>b</sup> | 42.4 $\pm$ 1.6 <sup>b</sup> | 45.6 $\pm$ 3.0 <sup>b</sup> | 64.8 $\pm$ 1.6 <sup>b</sup>  |
| 15                                 | 61.4 $\pm$ 1.3 <sup>c</sup> | 61.8 $\pm$ 1.1 <sup>c</sup> | 63.2 $\pm$ 2.0 <sup>c</sup> | 63.2 $\pm$ 2.0 <sup>c</sup> | 64.5 $\pm$ 1.9 <sup>c</sup> | 89.1 $\pm$ 1.4 <sup>c</sup>  |
| 20                                 | 70.2 $\pm$ 1.3 <sup>d</sup> | 74.4 $\pm$ 1.6 <sup>d</sup> | 81.7 $\pm$ 1.7 <sup>d</sup> | 82.1 $\pm$ 1.5 <sup>d</sup> | 93.3 $\pm$ 3.1 <sup>d</sup> | 100 $\pm$ 0.0 <sup>d</sup>   |
| Shapiro-Wilk                       | s                           | s                           | s                           | s                           | s                           | ns                           |

Mean of five replication  $\pm$  SE



**Table 4: Oviposition deterrent (number of eggs/insect/day) of essential oil from *C. citrinus* on *T. castaneum***

| <b>Concentrations<br/>(<math>\mu\text{L/L}</math>)</b> | <b>Number of Eggs laid</b> | <b>Knockdown (%)</b> |
|--------------------------------------------------------|----------------------------|----------------------|
| <b>Control</b>                                         | 5.8 $\pm$ 0.37             | 0.0 $\pm$ 0.0        |
| <b>5</b>                                               | 4.6 $\pm$ 0.51             | 0.0 $\pm$ 0.0        |
| <b>10</b>                                              | 3.8 $\pm$ 0.20*            | 5.5 $\pm$ 0.49**     |
| <b>20</b>                                              | 2.6 $\pm$ 0.24**           | 24.0 $\pm$ 0.61**    |
| <b>30</b>                                              | 1.4 $\pm$ 0.24**           | 35.5 $\pm$ 0.93**    |

bioRxiv preprint doi: <https://doi.org/10.1101/2021.01.05.425383>; this version posted January 5, 2021. The copyright holder for this preprint (which was not certified by peer review) is the author/funder, who has granted bioRxiv a license to display the preprint in perpetuity. It is made available under aCC-BY 4.0 International license.

\*- significant by Student's t-test ; \*\*-Highly significant by Student's t-test

**Table 5: Bioefficacy of essential oil from *C. citrinus* against different life stages of *T. Castaneum***

| <b>Concentrations</b> | <b>Ovicidal activity (%)</b> | <b>Egg hatchability (%)</b> | <b>Larval survival (%)</b> | <b>Adult emergence of F1 generation (%)</b> |
|-----------------------|------------------------------|-----------------------------|----------------------------|---------------------------------------------|
| <b>Control</b>        | 10.85±0.25                   | 89.15±0.25                  | 86.96±1.23                 | 80.58±1.15                                  |
| <b>5</b>              | 43.45±0.23                   | 56.55±0.24**                | 70.67±0.57*                | 53.45±0.27**                                |
| <b>10</b>             | 56.78±0.36                   | 43.29±0.36**                | 60.61±1.41**               | 36.14±0.90**                                |
| <b>20</b>             | 78.69±0.15                   | 21.31±0.15**                | 51.04±1.22**               | 21.82±0.67**                                |
| <b>30</b>             | 91.49±0.13                   | 8.51±0.13**                 | 42.54±1.32**               | 5.15±2.10**                                 |

Mean of five replication ± SE; \*- significant by Student's t-test; \*\*-Highly significant by Student's t-test

bioRxiv preprint doi: <https://doi.org/10.1101/2021.01.05.425383>; this version posted January 5, 2021. The copyright holder for this preprint (which was not certified by peer review) is the author/funder, who has granted bioRxiv a license to display the preprint in perpetuity. It is made available under aCC-BY 4.0 International license.
